# Supplementary material
Source: ML conference proceedings conference paper supplement (https://openreview.net/forum?id=E3ZUEaeFYS)
Supplement: supplementary_material [file attachment]

---

# Coupled Gradient Flows for Strategic Non-Local Distribution Shift

---

Anonymous Author(s)

Affiliation

Address

email

## Abstract

1 We propose a novel framework for analyzing the dynamics of distribution shift in  
2 real-world systems that captures the feedback loop between learning algorithms and  
3 the distributions on which they are deployed. Prior work largely models feedback-  
4 induced distribution shift as adversarial or via an overly simplistic distribution-shift  
5 structure. In contrast, we propose a coupled partial differential equation model that  
6 captures fine-grained changes in the distribution over time by accounting for com-  
7 plex dynamics that arise due to strategic responses to algorithmic decision-making,  
8 non-local endogenous population interactions, and other exogenous sources of dis-  
9 tribution shift. We consider two common settings in machine learning: cooperative  
10 settings with information asymmetries, and competitive settings where a learner  
11 faces strategic users. For both of these settings, when the algorithm retrains via  
12 gradient descent, we prove asymptotic convergence of the retraining procedure to  
13 a steady-state, both in finite and in infinite dimensions, obtaining explicit rates in  
14 terms of the model parameters. To do so we derive new results on the convergence  
15 of coupled PDEs that extends what is known on multi-species systems. Empirically,  
16 we show that our approach captures well-documented forms of distribution shifts  
17 like polarization and disparate impacts that simpler models cannot capture.

## 18 1 Introduction

19 In many machine learning tasks, there are commonly sources of exogenous and endogenous dis-  
20 tribution shift, necessitating that the algorithm be retrained repeatedly over time. Some of these  
21 shifts occur without the influence of an algorithm; for example, individuals influence each other to  
22 become more or less similar in their attributes, or benign forms of distributional shift occur [Qui+].  
23 Other shifts, however, are in response to algorithmic decision-making. Indeed, the very use of a  
24 decision-making algorithm can incentivize individuals to change or mis-report their data to achieve  
25 desired outcomes—a phenomenon known in economics as Goodhart’s law. Such phenomena have  
26 been empirically observed, a well-known example being in [CC11], where researchers observed  
27 a population in Columbia strategically mis-reporting data to game a poverty index score used for  
28 distributing government assistance. Works such as [Mil+20; Wil+21], which investigate the effects of  
29 distribution shift over time on a machine learning algorithm, point toward the need for evaluating the  
30 robustness of algorithms to distribution shifts. Many existing approaches for modeling distribution  
31 shift focus on simple metrics like optimizing over moments or covariates [DY10; LHL21; BBS09].  
32 Other methods consider worst-case scenarios, as in distributionally robust optimization [AZ22;  
33 LFG22; DN21; Kuh+19]. However, when humans respond to algorithms, these techniques may not  
34 be sufficient to holistically capture the impact an algorithm has on a population. For example, an  
35 algorithm that takes into account shifts in a distribution’s mean might inadvertently drive polarization,  
36 rendering a portion of the population disadvantaged.

Motivated by the need for a more descriptive model, we present an alternative perspective which allows us to fully capture complex dynamics that might drive distribution shifts in real-world systems. Our approach is general enough to capture various sources of exogenous and endogenous distribution shift including the feedback loop between algorithms and data distributions studied in the literature on performative prediction [Per+20; IYZ21; Ray+22; Nar+22; MPZ21], the strategic interactions studied in strategic classification [Har+16; Don+18], and also endogenous factors like intra-population dynamics and distributional shifts. Indeed, while previous works have studied these phenomena in isolation, our method allows us to capture all of them as well as their interactions. For example, in [Zrn+21], the authors investigate the effects of dynamics in strategic classification problems—but the model they analyze does not capture individual interactions in the population. In [IYZ21], the authors model the interaction between a population that repeatedly responds to algorithmic decision-making by shifting its mean. Additionally, [Ray+22] study settings in which the population has both exogenous and endogenous distribution shifts due to feedback, but much like the other cited work, the focus remains on average performance. Each of these works fails to account for diffusion or intra-population interactions that can result in important qualitative changes to the distribution.

**Contributions.** Our approach to this problem relies on a detailed non-local PDE model of the data distribution which captures each of these factors. One term driving the evolution of the distribution over time captures the response of the population to the deployed algorithm, another draws on models used in the PDE literature for describing non-local effects and consensus in biological systems to model intra-population dynamics, and the last captures a background source of distribution shift. This is coupled with an ODE, lifted to a PDE, which describes the training of a machine learning algorithm results in a coupled PDE system which we analyze to better understand the behaviors that can arise among these interactions.

In one subcase, our model exhibits a joint gradient flow structure, where both PDEs can be written as gradients flows with respect to the same joint energy, but considering infinite dimensional gradients with respect to the different arguments. This mathematical structure provides powerful tools for analysis and has been an emerging area of study with a relatively small body of prior work, none of which related to distribution shifts in societal systems, and a general theory for multi-species gradient flows is still lacking. We give a brief overview of the models that are known to exhibit this joint gradient flow structure: in [DS20] the authors consider a two-species tumor model with coupling through Brinkman’s Law. A number of works consider coupling via convolution kernels [Bur+18; Giu+22; JPZ22; CHS18; FF13; FF13; DT20] and cross-diffusion [LY22; AB21; MKB14], with applications in chemotaxis among other areas. In the models we consider here, the way the interaction between the two populations manifests is neither via cross-diffusion, nor via the non-local interaction term. It represents a new way of coupling the evolution of two interacting species via gradient flows and our results on the long-time asymptotics for these coupled PDEs add to the current state-of-the-art in the field. In the other subcase, we prove exponential convergence in two competitive, timescale separated settings where the algorithm and strategic population have conflicting objectives. We show numerically that retraining in a competitive setting leads to polarization in the population, illustrating the importance of fine-grained modeling.

## 2 Problem Formulation

Machine learning algorithms that are deployed into the real world for decision-making often become part of complex feedback loops with the data distributions and data sources with which they interact. In an effort to model these interactions, consider a machine learning algorithm that has loss given by  $L(z, x)$  where  $x \in \mathbb{R}^d$  are the algorithm parameters and  $z \in \mathbb{R}^d$  are the population attributes, and the goal is to solve

$$\operatorname{argmin}_{x \in \mathcal{X}} \mathbb{E}_{z \sim \rho} L(z, x),$$

where  $\mathcal{X}$  is the class of model parameters and  $\rho(z)$  is the population distribution. Individuals have an objective given by  $J(z, x)$  in response to a model parameterized by  $x$ , and they seek to solve

$$\operatorname{argmin}_{z \in \mathbb{R}^d} \mathbb{E}_{x \sim \rho} J(z, x).$$

When individuals in the population and the algorithm have access to gradients, we model the optimization process as a gradient-descent-type process. Realistically, individuals in the population

will have nonlocal information and influences, as well as external perturbations, the effects of which we seek to capture in addition to just minimization. To address this, we propose a partial differential equation (PDE) model for the population, that while modelling the individuals as a collective population, also maintains the nonlocal interactions of individuals. The model for this strategic population population is given by

$$\partial_t \rho = \operatorname{div} \left( \rho \nabla \delta_\rho \left[ \mathbb{E}_{z \sim \rho} J(z, x) + E(\rho) \right] \right), \quad (1)$$

where  $E(\rho)$  is a functional with terms for influences and external perturbations. In real-world deployment of algorithms, decision makers update their algorithm over time, leading to an interaction between the two processes. We also consider the algorithm dynamics over time, which we model as

$$\dot{x} = -\nabla_x \left[ \mathbb{E}_{z \sim \rho} L(z, x) \right]. \quad (2)$$

In this work, we analyze the behavior of the dynamics under the following model. The algorithm suffers a cost  $f_1(z, x)$  for a data point  $z$  under model parameters  $x$  in the strategic population, and a cost  $f_2(z, x)$  for a data point in a fixed, non-strategic population. The strategic population is denoted by  $\rho \in \mathcal{P}$ , and the non-strategic  $\bar{\rho} \in \mathcal{P}$ , where  $\mathcal{P}$  is the space of probability measures on the Borel sigma algebra. The algorithm aims to minimize

$$\mathbb{E}_{z \sim \rho} L(z, x) = \int f_1(z, x) d\rho(z) + \int f_2(z, x) d\bar{\rho}(z) + \frac{\beta}{2} \|x - x_0\|^2,$$

where the norm is the vector inner product  $\|x\|^2 = \langle x, x \rangle$  and  $\beta > 0$  weighs the cost of updating the model parameters from its initial condition.

We consider two settings: (i) aligned objectives, and (ii) competing objectives. Case (i) captures the setting in which the strategic population minimization improves the performance of the algorithm, subject to a cost for deviating from a reference distribution  $\bar{\rho} \in \mathcal{P}$ . This cost stems from effort required to manipulate features, such as a loan applicant adding or closing credit cards. On the other hand, Case (ii) captures the setting in which the strategic population minimization worsens the performance of the algorithm, again incurring cost from distributional changes.

## 2.1 Case (i): Aligned Objectives

In this setting, we consider the case where the strategic population and the algorithm have aligned objectives. This occurs in examples such as recommendation systems, where users and algorithm designers both seek to develop accurate recommendations for the users. This corresponds to the population cost

$$\mathbb{E}_{z \sim \rho, x \sim \mu} J(z, x) = \iint f_1(z, x) d\rho(z) d\mu(x) + \alpha KL(\rho | \bar{\rho}),$$

where  $KL(\cdot | \cdot)$  denotes the Kullback-Leibler divergence. Note that the KL divergence introduces diffusion to the dynamics for  $\rho$ . The weight  $\alpha > 0$  parameterizes the cost of distribution shift to the population. To account for nonlocal information and influence among members of the population, we include a kernel term  $E(\rho) = \frac{1}{2} \int \rho W * \rho dz$ , where  $W * \rho$  is a convolution integral and  $W$  is a suitable interaction potential.

## 2.2 Case (ii): Competing Objectives

In settings such as online internet forums, where algorithms and users have used manipulative strategies for marketing [Del06], the strategic population may be incentivized to modify or mis-report their attributes. The algorithm has a competitive objective, in that it aims to maintain performance against a population whose dynamics cause the algorithm performance to suffer. When the strategic population seeks an outcome contrary to the algorithm, we model strategic population cost as

$$\mathbb{E}_{z \sim \rho, x \sim \mu} J(z, x) = - \iint f_1(z, x) d\rho(z) d\mu(x) + \alpha KL(\rho | \bar{\rho}).$$

A significant factor in the dynamics for the strategic population is the timescale separation between the two "species"—i.e., the population and the algorithm. In our analysis, we will consider two cases: one, where the population responds much faster than the algorithm, and two, where the algorithm responds much faster than the population. We illustrate the intermediate case in a simulation example.

### 3 Results

We are interested in characterizing the long-time asymptotic behavior of the population distribution, as it depends on the decision-makers action over time. The structure of the population distribution gives us insights about how the decision-makers actions influences the entire population of users. For instance, as noted in the preceding sections, different behaviors such as bimodal distributions or large tails or variance might emerge, and such effects are not captured in simply looking at average performance. To understand this intricate interplay, one would like to characterize the behavior of both the population and the algorithm over large times. Our main contribution towards this goal is a novel analytical framework as well as analysis of the long-time asymptotics.

A key observation is that the dynamics in (1) and (2) can be re-formulated as a gradient flow; we lift  $x$  to a probability distribution  $\mu$  by representing it as a Dirac delta  $\mu$  sitting at the point  $x$ . As a result, the evolution of  $\mu$  will be governed by a PDE, and combined with the PDE for the population, we obtain a system of coupled PDEs,

$$\begin{aligned}\partial_t \rho &= \operatorname{div} \left( \rho \nabla_z \delta_\rho \left[ \mathbb{E}_{z \sim \rho, x \sim \mu} J(z, x) + E(\rho) \right] \right) \\ \partial_t \mu &= \operatorname{div} \left( \mu \nabla_x \delta_\mu \left[ \mathbb{E}_{z \sim \rho, x \sim \mu} L(z, x) \right] \right),\end{aligned}$$

where  $\delta_\rho$  and  $\delta_\mu$  are first variations with respect to  $\rho$  and  $\mu$  according to Definition A.2. The natural candidates for the asymptotic profiles of this coupled system are its steady states, which - thanks to the gradient flow structure - can be characterized as ground states of the corresponding energy functionals. In this work, we show existence and uniqueness of minimizers (maximizers) for the functionals under suitable conditions on the dynamics. We also provide criteria for convergence and explicit convergence rates. We begin with the case where the interests of the population and algorithm are aligned, and follow with analogous results in the competitive setting. We show convergence energy, which ensures convergence in a product Wasserstein metric. For convergence in energy, we use the notion of relative energy and prove that the relative energy converges to zero as time increases.

**Definition 1 (Relative Energy).** *The relative energy of a functional  $G$  is given by  $G(\gamma|\gamma_\infty) = G(\gamma) - G(\gamma_\infty)$ , where  $G(\gamma_\infty)$  is the energy at the steady state.*

Since we consider the joint evolution of two probability distributions, we define a distance metric  $\overline{W}$  on the product space of probability measures with bounded second moment. We will establish convergence both in energy and in the metric  $\overline{W}$ .

**Definition 2 (Joint Wasserstein Metric).** *The metric over  $\mathcal{P}_2 \times \mathcal{P}_2$  is called  $\overline{W}$  and is given by*

$$\overline{W}((\rho, \mu), (\tilde{\rho}, \tilde{\mu}))^2 = W_2(\rho, \tilde{\rho})^2 + W_2(\mu, \tilde{\mu})^2$$

for all pairs  $(\rho, \mu), (\tilde{\rho}, \tilde{\mu}) \in \mathcal{P}_2(\mathbb{R}^d) \times \mathcal{P}_2(\mathbb{R}^d)$ , and where  $W_2$  denotes the Wasserstein-2 metric (see Definition 3). We denote by  $\overline{W}(\mathbb{R}^d) := (\mathcal{P}_2(\mathbb{R}^d) \times \mathcal{P}_2(\mathbb{R}^d), \overline{W})$  the corresponding metric space.

#### 3.1 Gradient Flow Structure

In the case where the objectives of the algorithm and population are aligned, we can write the dynamics as a gradient flow by using the same energy functional for both species. Let  $G_a(\rho, \mu) : \mathcal{P}(\mathbb{R}^d) \times \mathcal{P}(\mathbb{R}^d) \mapsto [0, \infty]$  be the energy functional given by

$$\begin{aligned}G_a(\rho, \mu) &= \iint f_1(z, x) d\rho(z) d\mu(x) + \iint f_2(z, x) d\tilde{\rho}(z) d\mu(x) + \alpha K L(\rho|\tilde{\rho}) + \frac{1}{2} \int \rho W * \rho \\ &\quad + \frac{\beta}{2} \int \|x - x_0\|^2 d\mu(x).\end{aligned}$$

This expression is well-defined as the relative entropy  $K L(\rho|\tilde{\rho})$  can be extended to the full set  $\mathcal{P}(\mathbb{R}^d)$  by setting  $G_a(\rho, \mu) = +\infty$  in case  $\rho$  is not absolutely continuous with respect to  $\tilde{\rho}$ .

In the competitive case we define  $G_c(\rho, x) : \mathcal{P}(\mathbb{R}^d) \times \mathbb{R}^d \mapsto [-\infty, \infty]$  by

$$G_c(\rho, x) = \int f_1(z, x) d\rho(z) + \int f_2(x, z') d\tilde{\rho}(z') - \alpha K L(\rho|\tilde{\rho}) - \frac{1}{2} \int \rho W * \rho + \frac{\beta}{2} \|x - x_0\|^2.$$

166 In settings like recommender systems, the population and algorithm have aligned objectives; they  
 167 seek to minimize the same cost but are subject to different dynamic constraints and influences,  
 168 modeled by the regularizer and convolution terms. In the case where the objectives are aligned, the  
 169 dynamics are given by

$$\begin{aligned}\partial_t \rho &= \operatorname{div}(\rho \nabla_z \delta_\rho G_a[\rho, \mu]) \\ \partial_t \mu &= \operatorname{div}(\mu \nabla_x \delta_\mu G_a[\rho, \mu]).\end{aligned}\tag{3}$$

170 Note that (3) is a joint gradient flow, because the dynamics can be written in the form  $\partial_t \gamma =$   
 171  $\operatorname{div}(\gamma \nabla \delta_\gamma G_a(\gamma))$ , where  $\gamma = (\rho, \mu)$  and where the gradient and divergence are taken in both  
 172 variables  $(z, x)$ .

173 In other settings, such as credit score reporting, the objectives of the population are competitive with  
 174 the algorithm. Here we consider two scenarios; one, where the algorithm responds quickly relative  
 175 to the population, and two, where the population responds quickly relative to the algorithm. In the  
 176 case where the algorithm can immediately adjust optimally (best-respond) to the distribution, the  
 177 dynamics are given by

$$\begin{aligned}\partial_t \rho &= -\operatorname{div}(\rho (\nabla_z \delta_\rho G_c[\rho, x])|_{x=b(\rho)}), \\ b(\rho) &:= \operatorname{argmin}_{\bar{x}} G_c(\rho, \bar{x}).\end{aligned}\tag{4}$$

178 Next we can consider the population immediately responding to the algorithm, which has dynamics

$$\begin{aligned}\frac{d}{dt} x &= -\nabla_x G_c(\rho, x)|_{\rho=r(x)}, \\ r(x) &:= \operatorname{argmin}_{\hat{\rho} \in \mathcal{P}} -G_c(\hat{\rho}, x).\end{aligned}\tag{5}$$

179 The key results on existence and uniqueness of a ground state as well as the convergence behavior  
 180 of solutions depend on convexity (concavity) of  $G_a$  and  $G_c$ . The notion of convexity that we will  
 181 employ for energy functionals is *(uniform) displacement convexity*, which is analogous to (strong)  
 182 convexity in Euclidean spaces. One can think of displacement convexity for an energy functional  
 183 defined on  $\mathcal{P}_2$  as convexity along the shortest path in the Wasserstein-2 metric (linear interpolation in  
 184 the Wasserstein-2 space) between any two given probability distributions. For a detailed definition  
 185 of (uniform) displacement convexity and concavity, see Section A.2. In fact, suitable convexity  
 186 properties of the input functions  $f_1, f_2$  and  $\tilde{\rho}$  will ensure (uniform) displacement convexity of the  
 187 resulting energy functionals appearing in the gradient flow structure, see for instance [Vil03b, Chapter  
 188 5.2].

189 We make the following assumptions in both the competitive case and aligned interest cases. Here,  
 190  $I_d$  denotes the  $d \times d$  identity matrix,  $\operatorname{Hess}(f)$  denotes the Hessian of  $f$  in all variables, while  $\nabla_x^2 f$   
 191 denotes the Hessian of  $f$  in the variable  $x$  only.

192 **Assumption 1** (Convexity of  $f_1$  and  $f_2$ ). *The functions  $f_1, f_2 \in C^2(\mathbb{R}^d \times \mathbb{R}^d; [0, \infty))$  satisfy for all*  
 193  *$(z, x) \in \mathbb{R}^d \times \mathbb{R}^d$  the following:*

- 194 • *There exists constants  $\lambda_1, \lambda_2 \geq 0$  such that  $\operatorname{Hess}(f_1) \succeq \lambda_1 I_{2d}$  and  $\nabla_x^2 f_2 \succeq \lambda_2 I_d$ ;*
- 195 • *There exist constants  $a_i > 0$  such that  $x \cdot \nabla_x f_i(z, x) \geq -a_i$  for  $i = 1, 2$ ;*
- 196 • *There exists a constant  $\sigma \geq 0$  such that  $\|\nabla_x \nabla_z f_1(z, x)\| \leq \sigma$ .*

197 **Assumption 2** (Reference Distribution Shape). *The reference distribution  $\tilde{\rho} \in \mathcal{P}(\mathbb{R}^d) \cap L^1(\mathbb{R}^d)$*   
 198 *satisfies  $\log \tilde{\rho} \in C^2(\mathbb{R}^d)$  and  $\nabla_z^2 \log \tilde{\rho}(z) \preceq -\tilde{\lambda} I_d$  for some  $\tilde{\lambda} > 0$ .*

199 **Assumption 3** (Convex Interaction Kernel). *The interaction kernel  $W \in C^2(\mathbb{R}^d; [0, \infty))$  is convex,*  
 200 *symmetric  $W(-z) = W(z)$ , and for some  $D > 0$  satisfies*

$$z \cdot \nabla_z W(z) \geq -D, \quad |\nabla_z W(z)| \leq D(1 + |z|) \quad \forall z \in \mathbb{R}^d.$$

201 We make the following observations regarding the assumptions above:

- 202 • The convexity in Assumption 3 can be relaxed and without affecting the results outlined  
 203 below by following a more detailed analysis analogous to the approach in [CMV03].
- 204 • If  $f_1$  and  $f_2$  are strongly convex, the proveable convergence rate increases, but without strict  
 205 or strong convexity of  $f_1$  and  $f_2$ , the regularizers  $KL(\rho|\tilde{\rho})$  and  $\int \|x - x_0\|_2^2 dx$  provide the  
 206 convexity guarantees necessary for convergence.

207 For concreteness, one can consider the following classical choices of input functions to the evolution:

- 208 • Using the log-loss function for  $f_1$  and  $f_2$  satisfies Assumption 1.
- 209 • Taking the reference measure  $\tilde{\rho}$  to be the normal distribution satisfies Assumption 2, which
- 210 ensures the distribution is not too flat.
- 211 • Taking quadratic interactions  $W(z) = \frac{1}{2}|z|^2$  satisfies Assumption 3.

212 **Remark 1** (Cauchy-Problem). *To complete the arguments on convergence to equilibrium, we require*  
 213 *sufficient regularity of solutions to the PDEs under consideration. In fact, it is sufficient if we can*  
 214 *show that equations (3), (4), and (5) can be approximated by equations with smooth solutions. Albeit*  
 215 *tedious, these are standard techniques in the regularity theory for partial differential equations,*  
 216 *see for example [CMV03, Proposition 2.1 and Appendix A], [OV00], [Vil03b, Chapter 9], and the*  
 217 *references therein. Similar arguments as in [DV00] are expected to apply to the coupled gradient*  
 218 *flows considered here, guaranteeing existence of smooth solutions with fast enough decay at infinity,*  
 219 *and we leave a detailed proof for future work.*

### 220 3.2 Analysis of Case (i): Aligned Objectives

221 The primary technical contribution of this setting consists of lifting the algorithm dynamics from an  
 222 ODE to a PDE, which allows us to model the system as a joint gradient flow on the product space of  
 223 probability measures. The coupling occurs in the potential function, rather than as cross-diffusion or  
 224 non-local interaction as previously seen in the literature for multi-species systems.

225 **Theorem 1.** *Suppose that Assumptions 1-3 are satisfied and let  $\eta := \lambda_1 + \min(\lambda_2 + \beta, \alpha\tilde{\lambda}) > 0$ .*  
 226 *Consider solutions  $\gamma_t := (\rho_t, \mu_t)$  to the dynamics (3) with initial conditions satisfying  $\gamma_0 \in \mathcal{P}_2(\mathbb{R}^d) \times$*   
 227  *$\mathcal{P}_2(\mathbb{R}^d)$  and  $G_a(\gamma_0) < \infty$ . Then the following hold:*

228 (a) *There exists a unique minimizer  $\gamma_\infty$  of  $G_a$ , which is also the unique steady state for equation*  
 229 *(3).*

230 (b) *The solution  $\gamma_t$  converges exponentially fast in  $G_a$  and  $\overline{W}$ ,*

$$G_a(\gamma_t | \gamma_\infty) \leq e^{-2\eta t} G_a(\gamma_0 | \gamma_\infty) \quad \text{and} \quad \overline{W}(\gamma_t, \gamma_\infty) \leq ce^{-\eta t} \quad \text{for all } t \geq 0,$$

231 *where  $c > 0$  is a constant only depending on  $\gamma_0$ ,  $\gamma_\infty$  and the parameter  $\eta$ .*

232 *Proof.* (Sketch) For existence and uniqueness, we leverage classical techniques in the calculus  
 233 of variations. To obtain convergence to equilibrium in energy, our key result is a new HWI-type  
 234 inequality, providing as a consequence generalizations of the log-Sobolev inequality and the Talagrand  
 235 inequality. Together, these inequalities relate the energy (classically denoted by  $H$  in the case of the  
 236 Boltzmann entropy), the metric (classically denoted by  $W$  in the case of the Wasserstein-2 metric) and  
 237 the energy dissipation (classically denoted by  $I$  in the case of the Fisher information)<sup>1</sup>. Combining  
 238 these inequalities with Gronwall's inequality allows us to deduce convergence both in energy and in  
 239 the metric  $\overline{W}$ . □

### 240 3.3 Analysis of Case (ii): Competing Objectives

241 In this setting, we consider the case where the algorithm and the strategic population have goals in  
 242 opposition to each other; specifically, the population benefits from being classified incorrectly. First,  
 243 we will show that when the algorithm instantly best-responds to the population, then the distribution  
 244 of the population converges exponentially in energy and in  $W_2$ . Then we will show a similar result  
 245 for the case where the population instantly best-responds to the algorithm.

246 In both cases, we begin by proving two Danskin-type results (see [Dan67; Ber71]) which will be used  
 247 for the main convergence theorem, including convexity (concavity) results. To this end, we make the  
 248 following assumption ensuring that the regularizing component in the evolution of  $\rho$  is able to control  
 249 the convexity introduced by  $f_1$  and  $f_2$ .

250 **Assumption 4** (Upper bounds for  $f_1$  and  $f_2$ ). *There exists a constant  $\Lambda_1 > 0$  such that*

$$\nabla_z^2 f_1(z, x) \preceq \Lambda_1 I_d \quad \text{for all } (z, x) \in \mathbb{R}^d \times \mathbb{R}^d.$$

---

<sup>1</sup>Hence the name HWI inequalities.

251 and for any  $R > 0$  there exists a constant  $c_2 \in \mathbb{R}$  such that

$$\sup_{x \in B_R(0)} \int f_2(z, x) d\bar{\rho}(z) < c_2.$$

252 Equipped with Assumption 4, we state the result for a best-responding algorithm.

253 **Theorem 2.** Suppose Assumptions 1-4 are satisfied with  $\alpha\tilde{\lambda} > \Lambda_1$ . Let  $\lambda_b := \alpha\tilde{\lambda} - \Lambda_1$ . Define  
 254  $G_b(\rho) := G_c(\rho, b(\rho))$ . Consider a solution  $\rho_t$  to the dynamics (4) with initial condition  $\rho_0 \in \mathcal{P}_2(\mathbb{R}^d)$   
 255 such that  $G_b(\rho_0) < \infty$ . Then the following hold:

- 256 (a) There exists a unique maximizer  $\rho_\infty$  of  $G_b(\rho)$  which is also the unique steady state of (4).  
 257 (b) The solution  $\rho_t$  converges exponentially fast to  $\rho_\infty$  with rate  $\lambda_b$  in  $G_b(\cdot | \rho_\infty)$  and  $W_2$ ,

$$G_b(\rho_t | \rho_\infty) \leq e^{-2\lambda_b t} G_a(\rho_0 | \rho_\infty) \quad \text{and} \quad W_2(\rho_t, \rho_\infty) \leq ce^{-\lambda_b t} \quad \text{for all } t \geq 0,$$

258 where  $c > 0$  is a constant only depending on  $\rho_0$ ,  $\rho_\infty$  and the parameter  $\lambda_b$ .

259 *Proof.* (Sketch) The key addition in this setting as compared with Theorem 1 is proving that  $G_b(\rho)$   
 260 is bounded below, uniformly displacement concave and guaranteeing its smoothness via Berge's  
 261 Maximum Theorem. This is non-trivial as it uses the properties of the best response  $b(\rho)$ . A central  
 262 observation for our arguments to work is that  $\delta_\rho G_b[\rho] = (\delta_\rho G_c[\rho, x])|_{x=b(\rho)}$ . We can then conclude  
 263 using the direct method in the calculus of variations and the HWI method.  $\square$

264 Here, the condition that  $\alpha\tilde{\lambda}$  must be large enough corresponds to the statement that the system must  
 265 be subjected to a strong enough regularizing effect.

266 In the opposite case, where  $\rho$  instantly best-responds to the algorithm, we show Danskin-like results  
 267 for derivatives through the best response function and convexity of the resulting energy in  $x$  which  
 268 allows to deduce convergence.

269 **Theorem 3.** Suppose Assumptions 1-4 are satisfied. Define  $G_d(x) := G_c(r(x), x)$ . Then it holds:

- 270 (a) There exists a unique minimizer  $x_\infty$  of  $G_d(x)$ .  
 271 (b) The vector  $x(t)$  solving the dynamics (5) with initial condition  $x(0) \in \mathbb{R}^d$  converges  
 272 exponentially fast to  $x_\infty$  with rate  $\lambda_d := \lambda_1 + \lambda_2 + \beta > 0$  in  $G_d$  and in the Euclidean norm:

$$\|x(t) - x_\infty\| \leq e^{-\lambda_d t} \|x(0) - x_\infty\|,$$

$$G_d(x(t)) - G_d(x_\infty) \leq e^{-2\lambda_d t} (G_d(x(0)) - G_d(x_\infty))$$

273 for all  $t \geq 0$ .

274 These two theorems illustrate that, under sufficient convexity conditions on the cost functions, we  
 275 expect the distribution  $\rho$  and the algorithm  $x$  to converge to a steady state. In practice, when the  
 276 distributions are close enough to the steady state there is no need to retrain the algorithm.

277 While we have proven results for the extreme timescale cases, we anticipate convergence to the same  
 278 equilibrium in the intermediate cases. Indeed, it is well known (especially for systems in Euclidean  
 279 space) that two-timescale stochastic approximation dynamical systems, with appropriate stepsize  
 280 choices, converge asymptotically, and finite-time high probability concentration bounds can also  
 281 be obtained [Bor09]. These results have been leveraged in strategic classification [Zrn+21], and  
 282 Stackelberg games [FCR20; FR21; Fie+21]. We leave this intricate analysis to future work.

283 In the following section we show numerical results in the case of a best-responding  $x$ , best-responding  
 284  $\rho$ , and in between where  $x$  and  $\rho$  evolve on a similar timescale. Note that in these settings, the  
 285 dynamics do not have a gradient flow structure due to a sign difference in the energies, requiring  
 286 conditions to ensure that one species does not dominate the other.

## 287 4 Numerical Examples

288 We illustrate numerical results for the case of a classifier, which are used in scenarios such as loan  
 289 or government aid applications [CC11], school admissions [PS13], residency match [Ree18], and  
 290 recommendation algorithms [LSW10], all of which have some population which is incentivized

to submit data that will result in a desirable classification. For all examples, we select classifiers of the form  $x \in \mathbb{R}$ , so that a data point  $z \in \mathbb{R}$  is assigned a label of 1 with probability  $q(z, x) = (1 + \exp(-b^\top z + x))^{-1}$  where  $b > 0$ . Let  $f_1$  and  $f_2$  be given by

$$f_1(z, x) = -\log(1 - q(z, x)), \quad f_2(z, x) = -\log q(z, x).$$

Note that  $\text{Hess}(f_1) \succeq 0$  and  $\text{Hess}(f_2) \succeq$ , so  $\lambda_1 = \lambda_2 = 0$ . The strictness of the convexity of the functional is coming from the regularizers, not the cost functions. We show numerical results for two scenarios with additional settings in the appendix. First we illustrate competitive interests under three different timescale settings. Then we simulate the classifier taking an even more naïve strategy than gradient descent and discuss the results. The PDEs were implemented based on the finite volume method from [CCH15].

#### 4.1 Competitive Objectives

In the setting with competitive objectives, we utilize  $G_c(\rho, x)$  with  $W = 0$ ,  $f_1$  and  $f_2$  as defined above with  $b = 3$  fixed as it only changes the steepness of the classifier for  $d = 1$ , and  $\alpha = 0.1$  and  $\beta = 0.05$ . In Figure 1, we simulate two extremes of the timescale setting; first when  $\rho$  is nearly best-responding and then when  $x$  is best-responding. The simulations have the same initial conditions and end with the same distribution shape; however, the behavior of the strategic population differs in the intermediate stages. When  $\rho$  is nearly best-responding, we see that the distribution quickly shifts

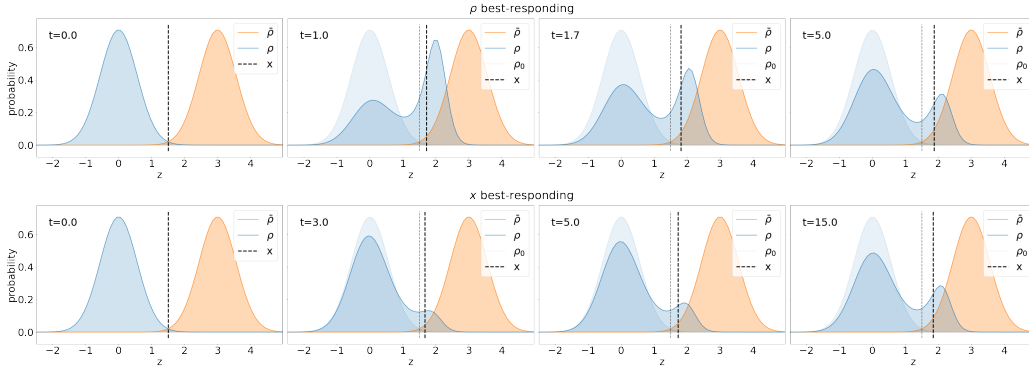

Figure 1: When  $x$  versus  $\rho$  best-responds, we observe the same final state but different intermediate states. Modes appear in the strategic population which simpler models cannot capture.

mass over the classifier threshold. Then the classifier shifts right, correcting for the shift in  $\rho$ , which then incentivizes  $\rho$  to shift more mass back to the original mode. In contrast, when  $x$  best-responds, the right-hand mode slowly increases in size until the system converges.

Figure 2 shows simulation results from the setting where  $\rho$  and  $x$  evolve on the same timescale. We observe that the distribution shift in  $\rho$  appears to fall between the two extreme timescale cases, which we expect. We highlight two important observations for the competitive case. One, a single-mode

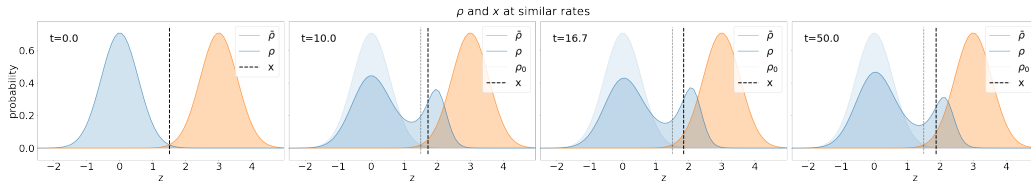

Figure 2: In this experiment the population and classifier have similar rates of change, and the distribution change for  $\rho$  exhibits behaviors from both the fast  $\rho$  and fast  $x$  simulations; the right-hand mode does not peak as high as the fast  $\rho$  case but does exceed its final height and return to the equilibrium.

distribution becomes bimodal, which would not be captured using simplistic metrics such as the mean and variance. This split can be seen as polarization in the population, a phenomenon that



315 a mean-based strategic classification model would not capture. Two, the timescale on which the  
 316 classifier updates significantly impacts the intermediate behavior of the distribution. In our example,  
 317 when  $x$  updated slowly relative to the strategic population, the shifts in the population were greater  
 318 than in the other two cases. This suggests that understanding the effects of timescale separation are  
 319 important for minimizing volatility of the coupled dynamics.

## 320 4.2 Naïve Behavior

321 In this example, we explore the results of the classifier adopting a non-gradient-flow strategy, where  
 322 the classifier chooses an initially-suboptimal value for  $x$  and does not move, allowing the strategic  
 population to respond. All functions and parameters are the same as in the previous example. When

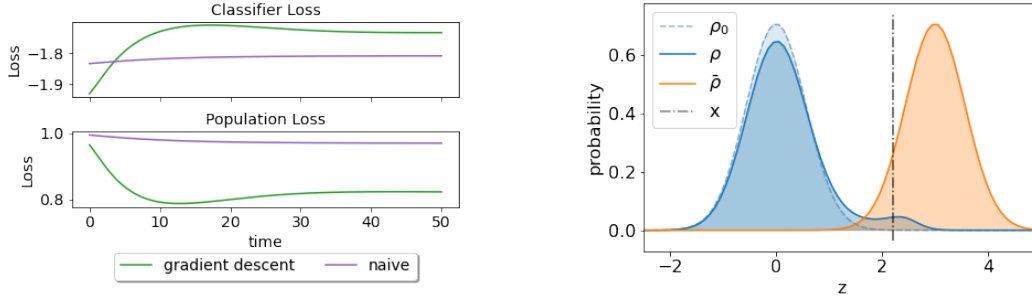

(a) Both species minimize their respective losses; when the classifier uses a naïve strategy, the final performance is better for the classifier and uniformly worse for the population.

(b) The classifier selects a suboptimal initial condition  $x = 2.2$ , instead of  $x = 1.5$  which minimizes the initial loss, and then does not move in response to the population.

Figure 3: Although the classifier starts with a larger cost by taking the naïve strategy, the final loss is better. This illustrates how our model can be used to compare robustness of different strategies against a strategic population.

323 comparing with the gradient descent strategy, we observe that while the initial loss for the classifier  
 324 is worse for the naïve strategy, the final cost is better. While this results is not surprising, because  
 325 one can view this as a general-sum game where the best response to a fixed decision may be better  
 326 than the equilibrium, it illustrates how our method provides a framework for evaluating how different  
 327 training strategies perform in the long run against a strategic population.  
 328

## 329 5 Future Directions, Limitations, and Broader Impact

330 Our work presents a method for evaluating the robustness of an algorithm to a strategic population,  
 331 and investigating a variety of robustness using our techniques opens a range of future research  
 332 directions. Additionally, our application suggests many questions relevant to the PDE literature, such  
 333 as: (1) Does convergence still hold with the gradient replaced by an estimated gradient? (2) Can we  
 334 prove convergence in between the two timescale extremes? (3) How do multiple dynamic populations  
 335 respond to an algorithm, or multiple algorithms?

336 A challenge in our method is that numerically solving high-dimensional PDEs is computationally  
 337 expensive and possibly unfeasible. Here we note that in many applications, agents in the population  
 338 do not alter more than a few features due to the cost of manipulation. We are encouraged by the  
 339 recent progress using deep learning to solve PDEs, which could be used in our application.

340 **Broader Impacts** Modeling the full population distribution rather than simple metrics of the distri-  
 341 bution is important because not all individuals are affected by the algorithm in the same way. For  
 342 example, if there are tails of the distribution that have poor performance even if on average the model  
 343 is good, we need to know how that group is advantaged or disadvantaged relative to the rest of the  
 344 population. Additionally, understanding how people respond to algorithms offers an opportunity to  
 345 incentivise people to move in a direction that increases social welfare.

## References

- [Ala40] Leon Alaoglu. “Weak Topologies of Normed Linear Spaces”. In: *The Annals of Mathematics* 41.1 (Jan. 1940), p. 252. ISSN: 0003486X. DOI: 10.2307/1968829. URL: <https://www.jstor.org/stable/1968829?origin=crossref> (visited on 05/24/2023).
- [Dan67] John M. Danskin. *The Theory of Max-Min and its Application to Weapons Allocation Problems*. Red. by M. Beckmann et al. Vol. 5. *Ä-konometrie und Unternehmensforschung / Econometrics and Operations Research*. Berlin, Heidelberg: Springer, 1967. ISBN: 9783642460944 9783642460920. DOI: 10.1007/978-3-642-46092-0. URL: <http://link.springer.com/10.1007/978-3-642-46092-0>.
- [Ber71] Dimitri P. Bertsekas. “Control of Uncertain Systems with a Set-Membership Description of Uncertainty”. PhD thesis. Cambridge, MA, USA: MIT, 1971.
- [Pos75] E. Posner. “Random coding strategies for minimum entropy”. In: *IEEE Transactions on Information Theory* 21.4 (July 1975), pp. 388–391. ISSN: 1557-9654. DOI: 10.1109/TIT.1975.1055416.
- [Rud91] Walter Rudin. *Functional analysis*. 2nd ed. International series in pure and applied mathematics. New York: McGraw-Hill, 1991. 424 pp. ISBN: 9780070542365.
- [McC97] Robert J. McCann. “A Convexity Principle for Interacting Gases”. In: *Advances in Mathematics* 128.1 (June 1, 1997), pp. 153–179. ISSN: 0001-8708. DOI: 10.1006/aima.1997.1634. URL: <https://www.sciencedirect.com/science/article/pii/S0001870897916340>.
- [BB00] Jean-David Benamou and Yann Brenier. “A computational fluid mechanics solution to the Monge-Kantorovich mass transfer problem”. In: *Numerische Mathematik* 84.3 (Jan. 1, 2000), pp. 375–393. ISSN: 0945-3245. DOI: 10.1007/s002110050002. URL: <https://doi.org/10.1007/s002110050002>.
- [DV00] Laurent Desvillettes and Cedric Villani. “On the spatially homogeneous landau equation for hard potentials part i : existence, uniqueness and smoothness”. In: *Communications in Partial Differential Equations* 25.1 (Jan. 1, 2000), pp. 179–259. ISSN: 0360-5302. DOI: 10.1080/03605300008821512. URL: <https://doi.org/10.1080/03605300008821512>.
- [OV00] F. Otto and C. Villani. “Generalization of an Inequality by Talagrand and Links with the Logarithmic Sobolev Inequality”. In: *Journal of Functional Analysis* 173.2 (June 1, 2000), pp. 361–400. ISSN: 0022-1236. DOI: 10.1006/jfan.1999.3557. URL: <https://www.sciencedirect.com/science/article/pii/S0022123699935577>.
- [Gho02] B. K. Ghosh. “Probability Inequalities Related to Markov’s Theorem”. In: *The American Statistician* 56.3 (2002), pp. 186–190. ISSN: 00031305. URL: <http://www.jstor.org/stable/3087296>.
- [CMV03] José A. Carrillo, Robert J. McCann, and Cédric Villani. “Kinetic equilibration rates for granular media and related equations: entropy dissipation and mass transportation estimates”. In: *Revista Matemática Iberoamericana* 19.3 (Dec. 2003), pp. 971–1018. ISSN: 0213-2230. URL: <https://projecteuclid.org/journals/revista-matematica-iberoamericana/volume-19/issue-3/Kinetic-equilibration-rates-for-granular-media-and-related-equations/rmi/1077293812.full>.
- [Vil03a] Cédric Villani. *Topics in Optimal Transportation*. Vol. 58. Graduate Studies in Mathematics. American Mathematical Society, Mar. 25, 2003. ISBN: 9780821833124 9780821872321 9781470418045. DOI: 10.1090/gsm/058. URL: <http://www.ams.org/gsm/058> (visited on 05/16/2023).
- [Vil03b] Cédric Villani. *Topics in optimal transportation*. Vol. 58. Graduate Studies in Mathematics. American Mathematical Society, Providence, RI, 2003, pp. xvi+370. ISBN: 0-8218-3312-X. DOI: 10.1090/gsm/058. URL: <https://doi.org/10.1090/gsm/058>.
- [Ste04] J. Michael Steele. *The Cauchy-Schwarz Master Class: An Introduction to the Art of Mathematical Inequalities*. Cambridge University Press, Apr. 26, 2004. 320 pp. ISBN: 9780521546775.
- [AB06] “Correspondences”. In: *Infinite Dimensional Analysis: A Hitchhiker’s Guide*. Ed. by Charalambos D. Aliprantis and Kim C. Border. Berlin, Heidelberg: Springer, 2006, pp. 555–590. ISBN: 9783540295877. DOI: 10.1007/3-540-29587-9\_17. URL: [https://doi.org/10.1007/3-540-29587-9\\_17](https://doi.org/10.1007/3-540-29587-9_17).

- [CMV06] José A. Carrillo, Robert J. McCann, and Cedric Villani. “Contractions in the 2-Wasserstein Length Space and Thermalization of Granular Media”. In: *Archive for Rational Mechanics and Analysis* 179.2 (Feb. 1, 2006), pp. 217–263. ISSN: 1432-0673. DOI: 10.1007/s00205-005-0386-1. URL: <https://doi.org/10.1007/s00205-005-0386-1> (visited on 05/24/2023).
- [Del06] Chrysanthos Dellarocas. “Strategic Manipulation of Internet Opinion Forums: Implications for Consumers and Firms”. In: *Management Science* 52.10 (Oct. 2006), pp. 1577–1593. ISSN: 0025-1909, 1526-5501. DOI: 10.1287/mnsc.1060.0567. URL: <https://pubsonline.informs.org/doi/10.1287/mnsc.1060.0567> (visited on 05/17/2023).
- [BCL09] Andrea L. Bertozzi, Jose A. Carrillo, and Thomas Laurent. “Blow-up in multidimensional aggregation equations with mildly singular interaction kernels\*”. In: *Nonlinearity* 22.3 (Feb. 2009), p. 683. ISSN: 0951-7715. DOI: 10.1088/0951-7715/22/3/009. URL: <https://dx.doi.org/10.1088/0951-7715/22/3/009> (visited on 05/24/2023).
- [BBS09] Steffen Bickel, Michael Brückner, and Tobias Scheffer. “Discriminative Learning Under Covariate Shift”. In: *The Journal of Machine Learning Research* 10 (Dec. 1, 2009), pp. 2137–2155. ISSN: 1532-4435.
- [Bor09] Vivek S Borkar. *Stochastic approximation: a dynamical systems viewpoint*. Vol. 48. Springer, 2009.
- [DY10] Erick Delage and Yinyu Ye. “Distributionally Robust Optimization Under Moment Uncertainty with Application to Data-Driven Problems”. In: *Operations Research* 58.3 (June 2010), pp. 595–612. ISSN: 0030-364X, 1526-5463. DOI: 10.1287/opre.1090.0741. URL: <https://pubsonline.informs.org/doi/10.1287/opre.1090.0741>.
- [LSW10] Juan Lang, Matt Spear, and S. Felix Wu. “Social Manipulation of Online Recommender Systems”. In: *Social Informatics*. Ed. by Leonard Bolc, Marek Makowski, and Adam Wierzbicki. Lecture Notes in Computer Science. Berlin, Heidelberg: Springer, 2010, pp. 125–139. ISBN: 9783642165672. DOI: 10.1007/978-3-642-16567-2\_10.
- [CC11] Adriana Camacho and Emily Conover. “Manipulation of Social Program Eligibility”. In: *American Economic Journal: Economic Policy* 3.2 (2011), pp. 41–65. ISSN: 1945-7731. URL: <https://www.jstor.org/stable/41238093>.
- [Car+11] J. A. Carrillo et al. “Global-in-time weak measure solutions and finite-time aggregation for nonlocal interaction equations”. In: *Duke Mathematical Journal* 156.2 (Feb. 1, 2011). ISSN: 0012-7094. DOI: 10.1215/00127094-2010-211. URL: <https://projecteuclid.org/journals/duke-mathematical-journal/volume-156/issue-2/Global-in-time-weak-measure-solutions-and-finite-time-aggregation/10.1215/00127094-2010-211.full> (visited on 05/24/2023).
- [BCY12] D. Balagu’e, J. Carrillo, and Y. Yao. “Confinement for repulsive-attractive kernels”. In: *Discrete and Continuous Dynamical Systems-series B* (2012). URL: <https://www.semanticscholar.org/paper/Confinement-for-repulsive-attractive-kernels-Balagu%27e-Carrillo/211b8c71330b956cd530ae9cc8aec03ff175b643> (visited on 05/24/2023).
- [BLL12] Andrea L. Bertozzi, Thomas Laurent, and Flavien Lager. “Aggregation and spreading via the newtonian potential: the dynamics of patch solutions”. In: *Mathematical Models and Methods in Applied Sciences* 22 (supp01 Apr. 2012), p. 1140005. ISSN: 0218-2025. DOI: 10.1142/S0218202511400057. URL: <https://www.worldscientific.com/doi/abs/10.1142/S0218202511400057> (visited on 05/24/2023).
- [FF13] Marco Di Francesco and Simone Fagioli. “Measure solutions for non-local interaction PDEs with two species”. In: *Nonlinearity* 26.10 (Oct. 1, 2013), pp. 2777–2808. ISSN: 0951-7715, 1361-6544. DOI: 10.1088/0951-7715/26/10/2777. URL: <https://iopscience.iop.org/article/10.1088/0951-7715/26/10/2777>.
- [PS13] Parag A. Pathak and Tayfun S̃nmez. “School Admissions Reform in Chicago and England: Comparing Mechanisms by Their Vulnerability to Manipulation”. In: *American Economic Review* 103.1 (Feb. 2013), pp. 80–106. ISSN: 0002-8282. DOI: 10.1257/aer.103.1.80. URL: <https://www.aeaweb.org/articles?id=10.1257/aer.103.1.80> (visited on 05/16/2023).

- [CCH14] José Antonio Carrillo, Michel Chipot, and Yanghong Huang. “On global minimizers of repulsive-attractive power-law interaction energies”. In: *Philosophical Transactions of the Royal Society A: Mathematical, Physical and Engineering Sciences* 372.2028 (Nov. 13, 2014), p. 20130399. ISSN: 1364-503X, 1471-2962. DOI: 10.1098/rsta.2013.0399. URL: <https://royalsocietypublishing.org/doi/10.1098/rsta.2013.0399> (visited on 05/24/2023).
- [MKB14] Alan Mackey, Theodore Kolokolnikov, and Andrea L. Bertozzi. “Two-species particle aggregation and stability of co-dimension one solutions”. In: *Discrete and Continuous Dynamical Systems* 19.5 (2014), pp. 1411–1436.
- [CCH15] José A. Carrillo, Alina Chertock, and Yanghong Huang. “A Finite-Volume Method for Nonlinear Nonlocal Equations with a Gradient Flow Structure”. In: *Communications in Computational Physics* 17.1 (Jan. 2015), pp. 233–258. ISSN: 1815-2406, 1991-7120. DOI: 10.4208/cicp.160214.010814a. URL: <https://www.cambridge.org/core/journals/communications-in-computational-physics/article/abs/finitevolume-method-for-nonlinear-nonlocal-equations-with-a-gradient-flow-structure/018EF83B9419424E1A34DB9492288FA4>.
- [Per15] Benoît Perthame. *Parabolic Equations in Biology: Growth, reaction, movement and diffusion*. Lecture Notes on Mathematical Modelling in the Life Sciences. Cham: Springer International Publishing, 2015. ISBN: 9783319194998 9783319195001. DOI: 10.1007/978-3-319-19500-1. URL: <https://link.springer.com/10.1007/978-3-319-19500-1> (visited on 05/24/2023).
- [San15a] Filippo Santambrogio. *Optimal Transport for Applied Mathematicians*. 2015. URL: <http://math.univ-lyon1.fr/~santambrogio/OTAM-cvgmt.pdf>.
- [San15b] Filippo Santambrogio. “Optimal Transport for Applied Mathematicians. Calculus of Variations, PDEs and Modeling”. In: (2015). URL: <https://www.math.u-psud.fr/~filippo/OTAM-cvgmt.pdf>.
- [Har+16] Moritz Hardt et al. “Strategic Classification”. In: *Proceedings of the 2016 ACM Conference on Innovations in Theoretical Computer Science*. ITCS ’16. New York, NY, USA: Association for Computing Machinery, Jan. 14, 2016, pp. 111–122. ISBN: 9781450340571. DOI: 10.1145/2840728.2840730. URL: <https://doi.org/10.1145/2840728.2840730>.
- [Bur+18] Martin Burger et al. “Sorting Phenomena in a Mathematical Model For Two Mutually Attracting/Repelling Species”. In: *SIAM Journal on Mathematical Analysis* 50.3 (Jan. 1, 2018), pp. 3210–3250. ISSN: 0036-1410. DOI: 10.1137/17M1125716. URL: <https://doi.org/10.1137/17M1125716>.
- [CHS18] José A. Carrillo, Yanghong Huang, and Markus Schmidtchen. “Zoology of a Nonlocal Cross-Diffusion Model for Two Species”. In: *SIAM Journal on Applied Mathematics* 78.2 (Jan. 2018), pp. 1078–1104. ISSN: 0036-1399, 1095-712X. DOI: 10.1137/17M1128782. URL: <https://epubs.siam.org/doi/10.1137/17M1128782>.
- [Don+18] Jinshuo Dong et al. “Strategic classification from revealed preferences”. In: *Proceedings of the 2018 ACM Conference on Economics and Computation*. 2018, pp. 55–70.
- [Ree18] Alex Rees-Jones. “Suboptimal behavior in strategy-proof mechanisms: Evidence from the residency match”. In: *Games and Economic Behavior*. Special Issue in Honor of Lloyd Shapley: Seven Topics in Game Theory 108 (Mar. 1, 2018), pp. 317–330. ISSN: 0899-8256. DOI: 10.1016/j.geb.2017.04.011. URL: <https://www.sciencedirect.com/science/article/pii/S0899825617300751> (visited on 05/16/2023).
- [Kuh+19] Daniel Kuhn et al. “Wasserstein Distributionally Robust Optimization: Theory and Applications in Machine Learning”. In: *Operations Research & Management Science in the Age of Analytics*. Ed. by Serguei Netessine, Douglas Shier, and Harvey J. Greenberg. INFORMS, Oct. 2019, pp. 130–166. ISBN: 9780990615330. DOI: 10.1287/educ.2019.0198. URL: <http://pubsonline.informs.org/doi/10.1287/educ.2019.0198>.
- [DS20] Tomasz Debiec and Markus Schmidtchen. “Incompressible Limit for a Two-Species Tumour Model with Coupling Through Brinkman’s Law in One Dimension”. In: *Acta Applicandae Mathematicae* 169.1 (Oct. 1, 2020), pp. 593–611. ISSN: 1572-9036. DOI: 10.1007/s10440-020-00313-1. URL: <https://doi.org/10.1007/s10440-020-00313-1>.

- [DT20] Manh Hong Duong and Julian Tugaut. “Coupled McKean-Vlasov diffusions: wellposedness, propagation of chaos and invariant measures”. In: *Stochastics* 92.6 (Aug. 17, 2020), pp. 900–943. ISSN: 1744-2508. DOI: 10.1080/17442508.2019.1677663. URL: <https://doi.org/10.1080/17442508.2019.1677663>.
- [FCR20] Tanner Fiez, Benjamin Chasnov, and Lillian Ratliff. “Implicit learning dynamics in stackelberg games: Equilibria characterization, convergence analysis, and empirical study”. In: *International Conference on Machine Learning*. PMLR, 2020, pp. 3133–3144.
- [Mil+20] John Miller et al. “The Effect of Natural Distribution Shift on Question Answering Models”. In: *Proceedings of the 37th International Conference on Machine Learning*. International Conference on Machine Learning. PMLR, Nov. 21, 2020, pp. 6905–6916. URL: <https://proceedings.mlr.press/v119/miller20a.html>.
- [Per+20] Juan Perdomo et al. “Performative Prediction”. In: *Proceedings of the 37th International Conference on Machine Learning*. International Conference on Machine Learning. PMLR, Nov. 21, 2020, pp. 7599–7609. URL: <https://proceedings.mlr.press/v119/perdomo20a.html>.
- [AB21] Abdulaziz Alsenafi and Alethea B. T. Barbaro. “A Multispecies Cross-Diffusion Model for Territorial Development”. In: *Mathematics* 9.12 (Jan. 2021), p. 1428. ISSN: 2227-7390. DOI: 10.3390/math9121428. URL: <https://www.mdpi.com/2227-7390/9/12/1428>.
- [DN21] John C. Duchi and Hongseok Namkoong. “Learning models with uniform performance via distributionally robust optimization”. In: *The Annals of Statistics* 49.3 (June 2021), pp. 1378–1406. ISSN: 0090-5364, 2168-8966. DOI: 10.1214/20-AOS2004. URL: <https://projecteuclid.org/journals/annals-of-statistics/volume-49/issue-3/Learning-models-with-uniform-performance-via-distributionally-robust-optimization/10.1214/20-AOS2004.full>.
- [FR21] Tanner Fiez and Lillian J Ratliff. “Local convergence analysis of gradient descent ascent with finite timescale separation”. In: *Proceedings of the International Conference on Learning Representation*. 2021.
- [Fie+21] Tanner Fiez et al. “Global convergence to local minmax equilibrium in classes of non-convex zero-sum games”. In: *Advances in Neural Information Processing Systems* 34 (2021), pp. 29049–29063.
- [IYZ21] Zachary Izzo, Lexing Ying, and James Zou. “How to Learn when Data Reacts to Your Model: Performative Gradient Descent”. In: *Proceedings of the 38th International Conference on Machine Learning*. International Conference on Machine Learning. PMLR, July 1, 2021, pp. 4641–4650. URL: <https://proceedings.mlr.press/v139/izzo21a.html>.
- [LHL21] Qi Lei, Wei Hu, and Jason D. Lee. “Near-Optimal Linear Regression under Distribution Shift”. In: *ArXiv* (June 23, 2021). URL: <https://www.semanticscholar.org/paper/Near-Optimal-Linear-Regression-under-Distribution-Lei-Hu/8d58212f38852aba3eccb8f3900299a495bba8e0>.
- [Liu+21] Lewis Liu et al. “Infinite-Dimensional Optimization for Zero-Sum Games via Variational Transport”. In: *Proceedings of the 38th International Conference on Machine Learning*. International Conference on Machine Learning. PMLR, July 1, 2021, pp. 7033–7044. URL: <https://proceedings.mlr.press/v139/liu21ac.html>.
- [MPZ21] John P Miller, Juan C Perdomo, and Tijana Zrnic. “Outside the echo chamber: Optimizing the performative risk”. In: *International Conference on Machine Learning*. PMLR, 2021, pp. 7710–7720.
- [Wil+21] Olivia Wiles et al. “A Fine-Grained Analysis on Distribution Shift”. In: *ArXiv* (Oct. 21, 2021). URL: <https://www.semanticscholar.org/paper/A-Fine-Grained-Analysis-on-Distribution-Shift-Wiles-Gowal/0e845ef0a3ae71bd32a6954fafe0702d0f0f033f>.
- [Zrn+21] Tijana Zrnic et al. “Who Leads and Who Follows in Strategic Classification?” In: *Advances in Neural Information Processing Systems*. Vol. 34. Curran Associates, Inc., 2021, pp. 15257–15269. URL: <https://proceedings.neurips.cc/paper/2021/hash/812214fb8e7066bfa6e32c626c2c688b-Abstract.html>.

- [AZ22] Alekh Agarwal and Tong Zhang. “Minimax Regret Optimization for Robust Machine Learning under Distribution Shift”. In: *Proceedings of Thirty Fifth Conference on Learning Theory*. Conference on Learning Theory. PMLR, June 28, 2022, pp. 2704–2729. URL: <https://proceedings.mlr.press/v178/agarwal22b.html>.
- [Giu+22] Valeria Giunta et al. “Local and Global Existence for Nonlocal Multispecies Advection-Diffusion Models”. In: *SIAM Journal on Applied Dynamical Systems* 21.3 (Sept. 2022), pp. 1686–1708. ISSN: 1536-0040. DOI: 10.1137/21M1425992. URL: <https://epubs.siam.org/doi/10.1137/21M1425992>.
- [JPZ22] Ansgar Jungel, Stefan Portisch, and Antoine Zurek. “Nonlocal cross-diffusion systems for multi-species populations and networks”. In: *Nonlinear Analysis* 219 (June 1, 2022), p. 112800. ISSN: 0362-546X. DOI: 10.1016/j.na.2022.112800. URL: <https://www.sciencedirect.com/science/article/pii/S0362546X22000153>.
- [LY22] Guanlin Li and Yao Yao. “Two-species competition model with chemotaxis: well-posedness, stability and dynamics”. In: *Nonlinearity* 35.3 (Feb. 3, 2022), p. 1329. ISSN: 0951-7715. DOI: 10.1088/1361-6544/ac4a8d. URL: <https://iopscience.iop.org/article/10.1088/1361-6544/ac4a8d/meta>.
- [LFG22] Fengming Lin, Xiaolei Fang, and Zheming Gao. “Distributionally Robust Optimization: A review on theory and applications”. In: *Numerical Algebra, Control and Optimization* 12.1 (2022), pp. 159–212.
- [Nar+22] Adhyayan Narang et al. “Learning in Stochastic Monotone Games with Decision-Dependent Data”. In: *International Conference on Artificial Intelligence and Statistics*. PMLR, 2022, pp. 5891–5912.
- [Ray+22] Mitas Ray et al. “Decision-dependent risk minimization in geometrically decaying dynamic environments”. In: *Proceedings of the AAAI Conference on Artificial Intelligence*. Vol. 36. 7. 2022, pp. 8081–8088.
- [CFG23] J. Carrillo, Alejandro Fernandez-Jimenez, and D. Gómez-Castro. “Partial mass concentration for fast-diffusions with non-local aggregation terms”. In: Apr. 10, 2023. URL: <https://www.semanticscholar.org/paper/Partial-mass-concentration-for-fast-diffusions-with-Carrillo-Fern%C3%A1ndez-Jim%C3%A9nez/5d1a0923f6bdaf24337c8161d6119175c406de5a> (visited on 05/24/2023).
- [Qui+] Joaquin Quinero-Candela et al. *Dataset Shift in Machine Learning*. MIT Press. URL: <https://mitpress.mit.edu/9780262545877/dataset-shift-in-machine-learning/>.

## A General structure and preliminaries

In this section, we give more details on the models discussed in the main article, and introduce definitions and notation that are needed for the subsequent proofs.

### A.1 Structure of the dynamics

For the case of aligned objectives, the full coupled system of PDEs (3) can be written as

$$\partial_t \rho = \alpha \Delta \rho + \operatorname{div} \left( \rho \nabla_z \left( \int f_1 d\mu - \alpha \log \tilde{\rho} + W * \rho \right) \right), \quad (6a)$$

$$\partial_t \mu = \operatorname{div} \left( \mu \nabla_x \left( \int f_1 d\rho + \int f_2 d\bar{\rho} + \frac{\beta}{2} \|x - x_0\|^2 \right) \right). \quad (6b)$$

In other words, the population  $\rho$  in (6a) is subject to an isotropic diffusive force with diffusion coefficient  $\alpha > 0$ , a drift force driven by the time-varying confining potential  $\int f_1 d\mu(t) - \alpha \log \tilde{\rho}$ , and a self-interaction force via the interaction potential  $W$ . If we consider the measure  $\mu$  to be given and fixed in time, this corresponds exactly to the type of parabolic equation studied in [CMV03]. Here however the dynamics are more complex due to the coupling of the confining potential with the dynamics (6b) for  $\mu(t)$  via the coupling potential  $f_1$ . Before presenting the analysis of this model, let us give a bit more intuition on the meaning and the structure of these dynamics.

In the setting where  $\mu$  represents a binary classifier, we can think of the distribution  $\bar{\rho}$  as all those individuals carrying the true label 1, say, and the distribution  $\rho(t)$  as all those individuals carrying a true label 0, say. The term  $\int f_1(z, x) \mu(t, dx)$  represents a penalty for incorrectly classifying an individual at  $z$  with true label 0 when using the classifier  $\mu(t, x)$ . In other words,  $\int f_1(z, x) \mu(t, dx) \in [0, \infty)$  is increasingly large the more  $z$  digresses from the correct classification 0. Similarly,  $\int f_1(z, x) \rho(t, dz) \in [0, \infty)$  is increasingly large if the population  $\rho$  shifts mass to locations in  $z$  where the classification is incorrect. The terminology *aligned objectives* refers to the fact that in (6) both the population and the classifier are trying to evolve in a way as to maximize correct classification. Analogously, the term  $\int f_2(z, x) \bar{\rho}(dz)$  is large if  $x$  would incorrectly classify the population  $\bar{\rho}$  that carries the label 1. A natural extension of the model (6) would be a setting where also the population carrying labels 1 evolves over time, which is simulated in Section E.2. Most elements of the new framework presented here would likely carry over the setting of three coupled PDEs: one for the evolution of  $\rho(t)$ , one for the evolution of  $\bar{\rho}(t)$  and one for the classifier  $\mu(t)$ .

The term

$$\alpha \Delta \rho - \alpha \operatorname{div} (\rho \nabla \log \tilde{\rho}) = \alpha \operatorname{div} (\rho \nabla \delta_\rho KL(\rho | \tilde{\rho}))$$

forces the evolution of  $\rho(t)$  to approach  $\tilde{\rho}$ . In other words, it penalizes (in energy) deviations from a given reference measure  $\tilde{\rho}$ . In the context of the application at hand, we take  $\tilde{\rho}$  to be the initial distribution  $\rho(t=0)$ . The solution  $\rho(t)$  then evolves away from  $\tilde{\rho}$  over time due to the other forces that are present. Therefore, the term  $KL(\rho | \tilde{\rho})$  in the energy both provides smoothing of the flow and a penalization for deviations away from the reference measure  $\tilde{\rho}$ .

The self-interaction term  $W * \rho$  introduces non-locality into the dynamics, as the decision for any given individual to move in a certain direction is influenced by the behavior of all other individuals in the population. The choice of  $W$  is application dependent. Very often, the interaction between two individuals only depends on the distance between them. This suggests a choice of  $W$  as a radial function, i.e.  $W(z) = \omega(|z|)$ . A choice of  $\omega : \mathbb{R} \rightarrow \mathbb{R}$  such that  $\omega'(r) > 0$  corresponds to an *attractive* force between individuals, whereas  $\omega'(r) < 0$  corresponds to a *repulsive* force. The statement  $|z| \omega'(|z|) = z \cdot \nabla_z W(z) \geq -D$  in Assumption 3 therefore corresponds to a requirement that the self-interaction force is not too repulsive. Neglecting all other forces in (6a), we obtain the non-local interaction equation

$$\partial_t \rho = \operatorname{div} (\rho \nabla W * \rho)$$

which appears in many instances in mathematical biology, mathematical physics, and material science, and it is an equation that has been extensively studied over the past few decades, see for example [Car+11; BCY12; CCH14; BCL09; BLL12; CMV06; CFG23] and references therein. Using the results from these works, our assumptions on the interaction potential  $W$  can be relaxed in many ways, for example by allowing discontinuous derivatives at zero for  $W$ , or by allowing  $W$  to be negative.

The dynamics (6b) for the algorithm  $\mu$  is a non-autonomous transport equation,

$$\partial_t \mu = \operatorname{div} (\mu v),$$

where the time-dependence in the velocity field

$$v(t, x) := \nabla_x \left( \int f_1(z, x) d\rho(t, z) + \int f_2(z, x) d\bar{\rho}(z) + \frac{\beta}{2} \|x - x_0\|^2 \right),$$

comes through the evolving population  $\rho(t)$ . This structure allows to obtain an explicit solution for  $\mu(t)$  in terms of the initial condition  $\mu_0$  and the solution  $\rho(t)$  to (6a) using the methods of characteristics.

640 **Proposition 4.** Assume that  $f_1$  and  $f_2$  are Lipschitz in  $x$  uniformly in  $z$ . Then the unique distributional solution  
641  $\mu(t)$  to (6b) is given by

$$\mu(t) = \Phi(t, 0, \cdot)_{\#} \mu_0, \quad (7)$$

642 where  $\Phi(t, s, x)$  solves the characteristic equation

$$\partial_s \Phi(s, t, x) + v(s, \Phi(s, t, x)) = 0, \quad \Phi(t, t, x) = x. \quad (8)$$

643 *Proof.* Thanks to Assumption 1, we have that  $v \in C^1(\mathbb{R} \times \mathbb{R}^d; \mathbb{R}^d)$ . Moreover, we claim that the velocity field  
644  $v$  satisfies

$$\|v(t, x)\| \leq c(1 + \|x\|) \quad \text{for all } t \geq 0, x \in \mathbb{R}^d \quad (9)$$

645 for some constant  $c > 0$  independent of  $t$  and  $x$ . By classical Cauchy-Lipschitz theory for ODEs, this guarantees  
646 the existence of a unique global solution  $\Phi(t, s, x)$  solving (8). Then it can be checked directly that  $\mu(t)$  as  
647 defined in (7) is a distributional solution to (6b).

648 It remains to prove the bound (9). Thanks to the Lipschitz assumption together with Assumption 1, we have that  
649  $\|\nabla_x f_1(z, x) + \nabla_x f_2(z, x)\| \leq c$  for all  $z, x \in \mathbb{R}^d$  for some constant  $c > 0$ . Therefore, we have

$$\left\| \int \nabla_x f_1(z, x) d\rho(z) + \int \nabla_x f_2(z, x) d\bar{\rho}(z) + \beta(x - x_0) \right\| \leq c'(1 + \|x\|)$$

650 for another constant  $c' > 0$ . □

651 **Remark 2.** The Lipschitz assumption on  $f_1$  and  $f_2$  can be relaxed as long as we can still guarantee that (9)  
652 holds.

653 In the characteristic equation (8),  $\Phi(s, t, x)$  is a parametrization of all trajectories: if a particle was at location  
654  $x$  at time  $t$ , then it is at location  $\Phi(s, t, x)$  at time  $s$ . Our assumptions on  $f_1, f_2$  and  $\bar{\rho}$  also ensure that  
655  $\Phi(s, t, \cdot) : \mathbb{R}^d \rightarrow \mathbb{R}^d$  is a  $C^1$ -diffeomorphism for all  $s, t \in \mathbb{R}$ . For more details on transport equations, see for  
656 example [Per15, Chapter 8.4].

657 **Remark 3.** Consider the special case where  $\mu_0 = \delta_{x_0}$  for some initial position  $x_0 \in \mathbb{R}^d$ . Then by Proposition 4,  
658 the solution to (6b) is given by  $\mu(t) = \delta_{x(t)}$ , where  $x(t) := \Phi(t, 0, x_0)$  solves the ODE

$$\dot{x}(t) = -v(t, x(t)), \quad x(0) = x_0,$$

659 which is precisely of type (2).

660 For the case of competing objectives, the two models we consider can be written as

$$\begin{aligned} \partial_t \rho &= -\operatorname{div}(\rho(\nabla(f_1(z, b(\rho)) - \alpha \log(\rho/\bar{\rho}) - \rho W * \rho)) , \\ b(\rho) &:= \operatorname{argmin}_{\bar{x}} \int f_1(z, \bar{x}) d\rho(z) + \int f_2(\bar{x}, z') d\bar{\rho}(z') + \frac{\beta}{2} \|\bar{x} - x_0\|^2 \end{aligned}$$

661 for (4), and

$$\begin{aligned} \frac{d}{dt} x &= -\nabla_x \left( \int f_1(z, x) r(x) (dz) + \int f_2(x, z') d\bar{\rho}(z') + \frac{\beta}{2} \|x - x_0\|^2 \right), \\ r(x) &:= \operatorname{argmax}_{\hat{\rho} \in \mathcal{P}} \int f_1(z, x) d\hat{\rho}(z) - \alpha KL(\hat{\rho}|\bar{\rho}) - \frac{1}{2} \int \hat{\rho} W * \hat{\rho}. \end{aligned}$$

662 for (5).

## 663 A.2 Definitions and notation

Here, and in what follows,  $I_d$  denotes the  $d \times d$  identity matrix, and  $\operatorname{id}$  denotes the identity map. The energy functionals we are considering are usually defined on the set of probability measures on  $\mathbb{R}^d$ , denoted by  $\mathcal{P}(\mathbb{R}^d)$ . If we consider the subset  $\mathcal{P}_2(\mathbb{R}^d)$  of probability measures with bounded second moment,

$$\mathcal{P}_2(\mathbb{R}^d) := \{\rho \in \mathcal{P}(\mathbb{R}^d) : \int_{\mathbb{R}^d} \|z\|^2 d\rho(z) < \infty\},$$

664 then we can endow this space with the Wasserstein-2 metric.

665 **Definition 3** (Wasserstein Metric). The Wasserstein metric between two probability measures  $\mu, \nu \in \mathcal{P}_2(\mathbb{R}^d)$  is  
666 given by

$$W_2(\mu, \nu)^2 = \inf_{\gamma \in \Gamma(\mu, \nu)} \int \|z - z'\|_2^2 d\gamma(z, z')$$

667 where  $\Gamma$  is the set of all joint probability distributions with marginals  $\mu$  and  $\nu$ , i.e.  $\mu(dz) = \int \gamma(dz, z') dz'$  and  
668  $\nu(dz') = \int \gamma(z, dz') dz$ .



669 The restriction to  $\mathcal{P}_2(\mathbb{R}^d)$  ensures that the  $W_2$  is always finite. Then the space  $(\mathcal{P}_2(\mathbb{R}^d), W_2)$  is indeed a metric  
 670 space. We will make use of the fact that  $W_2$  metrizes narrow convergence of probability measures. To make this  
 671 statement precise, let us introduce two common notions of convergence for probability measures, which are a  
 672 subset of the finite signed Radon measures  $\mathcal{M}(\mathbb{R}^d)$ .

673 **Definition 4.** Consider a sequence  $(\mu_n) \in \mathcal{M}(\mathbb{R}^d)$  and a limit  $\mu \in \mathcal{M}(\mathbb{R}^d)$ .

- **(Narrow topology)** The sequence  $(\mu_n)$  converges narrowly to  $\mu$ , denoted by  $\mu_n \rightarrow \mu$ , if for all continuous bounded functions  $f : \mathbb{R}^d \rightarrow \mathbb{R}$ ,

$$\int_{\mathbb{R}^d} f(z) d\mu_n(z) \rightarrow \int_{\mathbb{R}^d} f(z) d\mu(z).$$

- **(Weak-\* topology)** The sequence  $(\mu_n)$  converges weakly-\* to  $\mu$ , denoted by  $\mu_n \xrightarrow{*} \mu$ , if for all continuous functions vanishing at infinity (i.e.  $f : \mathbb{R}^d \rightarrow \mathbb{R}$  such that for all  $\epsilon > 0$  there exists a compact set  $K \subset \mathbb{R}^d$  such that  $|f(z)| < \epsilon$  on  $\mathbb{R}^d \setminus K$ ), we have

$$\int_{\mathbb{R}^d} f(z) d\mu_n(z) \rightarrow \int_{\mathbb{R}^d} f(z) d\mu(z).$$

674 Let us denote the set of continuous functions on  $\mathbb{R}^d$  vanishing at infinity by  $C_0(\mathbb{R}^d)$ , and the set of continuous  
 675 bounded functions by  $C_b(\mathbb{R}^d)$ . Note that narrow convergence immediately implies that  $\mu_n(\mathbb{R}^d) \rightarrow \mu(\mathbb{R}^d)$  as  
 676 the constant function is in  $C_b(\mathbb{R}^d)$ . This is not necessarily true for weak-\* convergence. We will later make use  
 677 of the Banach-Alaoglu theorem [Ala40], which gives weak-\* compactness of the unit ball in a dual space. Note  
 678 that  $\mathcal{M}(\mathbb{R}^d)$  is indeed the dual of  $C_0(\mathbb{R}^d)$ , and  $\mathcal{P}(\mathbb{R}^d)$  is the unit ball in  $\mathcal{M}(\mathbb{R}^d)$  using the dual norm. Moreover,  
 679 if we can ensure that mass does not escape to infinity, the two notions of convergence in Definition 4 are in fact  
 680 equivalent.

681 **Lemma 5.** Consider a sequence  $(\mu_n) \in \mathcal{M}(\mathbb{R}^d)$  and a measure  $\mu \in \mathcal{M}(\mathbb{R}^d)$ . Then  $\mu_n \rightarrow \mu$  if and only if  
 682  $\mu_n \xrightarrow{*} \mu$  and  $\mu_n(\mathbb{R}^d) \rightarrow \mu(\mathbb{R}^d)$ .

683 This follows directly from Definition 4. Here, the condition  $\mu_n(\mathbb{R}^d) \rightarrow \mu(\mathbb{R}^d)$  is equivalent to tightness of  $(\mu_n)$ ,  
 684 and follows from Markov's inequality [Gho02] if we can establish uniform bounds on the second moments, i.e.  
 685 we want to show that there exists a constant  $C > 0$  independent of  $n$  such that

$$\int \|x\|^2 d\mu_n(x) < C \quad \forall n \in \mathbb{N}. \quad (10)$$

686

687 **Definition 5** (Tightness of probability measures). A collection of measures  $(\mu_n) \in \mathcal{M}(\mathbb{R}^d)$  is tight if for all  
 688  $\epsilon > 0$  there exists a compact set  $K_\epsilon \subset \mathbb{R}^d$  such that  $|\mu_n|(\mathbb{R}^d \setminus K_\epsilon) < \epsilon$  for all  $n \in \mathbb{N}$ , where  $|\mu|$  denotes the  
 689 total variation of  $\mu$ .

690 Another classical result is that the Wasserstein-2 metric metrizes narrow convergence of probability measures,  
 691 see for example [San15a, Theorem 5.11] or [Vil03a, Theorem 7.12].

692 **Lemma 6.** Let  $\mu_n, \mu \in \mathcal{P}_2(\mathbb{R}^d)$ . Then  $W_2(\mu_n, \mu) \rightarrow 0$  if and only if

$$\mu_n \xrightarrow{*} \mu \quad \text{and} \quad \int_{\mathbb{R}^d} \|z\|^2 d\mu_n(z) \rightarrow \int_{\mathbb{R}^d} \|z\|^2 d\mu(z).$$

693 Next, we consider two measures  $\mu, \nu \in \mathcal{P}(\mathbb{R}^d)$  that are atomless, i.e.  $\mu(\{z\}) = 0$  for all  $z \in \mathbb{R}^d$ . By Brenier's  
 694 theorem [BB00] (also see [Vil03a, Theorem 2.32]) there exists a unique measurable map  $T : \mathbb{R}^d \rightarrow \mathbb{R}^d$  such  
 695 that  $T_{\#}\mu = \nu$ , and  $T = \nabla\psi$  for some convex function  $\psi : \mathbb{R}^d \rightarrow \mathbb{R}$ . Here, the push-forward operator  $\nabla\psi_{\#}$  is  
 696 defined as

$$\int_{\mathbb{R}^d} f(z) d\nabla\psi_{\#}\rho_0(z) = \int_{\mathbb{R}^d} f(\nabla\psi(z)) d\rho_0(z)$$

697 for all Borel-measurable functions  $f : \mathbb{R}^d \rightarrow \mathbb{R}_+$ . If  $\rho_1 = \nabla\psi_{\#}\rho_0$ , we denote by  $\rho_t = [(1-t)\text{id} + t\nabla\psi]_{\#}\rho_0$   
 698 the displacement interpolant between  $\rho_0$  and  $\rho_1$ . We are now ready to introduce the notion of displacement  
 699 convexity, which is the same as geodesic convexity in the geodesic space  $(\mathcal{P}_2(\mathbb{R}^d), W_2)$ . We will state the  
 700 definition here for atomless measures, but it can be relaxed to any measures in  $\mathcal{P}_2$  using optimal transport plans  
 701 instead of transport maps.

702 **Definition 6** (Displacement Convexity). A functional  $G : \mathcal{P} \rightarrow \mathbb{R}$  is displacement convex if for all  $\rho_0, \rho_1$  that  
 703 are atomless we have

$$G(\rho_t) \leq (1-t)G(\rho_0) + tG(\rho_1),$$

where  $\rho_t = [(1-t)\text{id} + t\nabla\psi]_{\#}\rho_0$  is the displacement interpolant between  $\rho_0$  and  $\rho_1$ . Further,  $G : \mathcal{P} \mapsto \mathbb{R}$  is uniformly displacement convex with constant  $\eta > 0$  if

$$G(\rho_t) \leq (1-t)G(\rho_0) + tG(\rho_1) - t(1-t)\frac{\eta}{2}W_2(\rho_0, \rho_1)^2,$$

where  $\rho_t = [(1-t)\text{id} + t\nabla\psi]_{\#}\rho_0$  is the displacement interpolant between  $\rho_0$  and  $\rho_1$ .

**Remark 4.** In other words,  $G$  is displacement convex (concave) if the function  $G(\rho_t)$  is convex (concave) with  $\rho_t = [(1-t)\text{id} + t\nabla\psi]_{\#}\rho_0$  being the displacement interpolant between  $\rho_0$  and  $\rho_1$ . Contrast this with the classical notion of convexity (concavity) for  $G$ , where we require that the function  $G((1-t)\rho_0 + t\rho_1)$  is convex (concave).

In fact, if the energy  $G$  is twice differentiable along geodesics, then the condition  $\frac{d^2}{ds^2}G(\gamma_s) \geq 0$  along any geodesic  $(\rho_s)_{s \in [0,1]}$  between  $\rho_0$  and  $\rho_1$  is sufficient to obtain displacement convexity. Similarly, when  $\frac{d^2}{ds^2}G(\rho_s) \geq \eta W_2(\rho_0, \rho_1)^2$ , then  $G$  is uniformly displacement convex with constant  $\eta > 0$ . For more details, see [McC97] and [Vil03a, Chapter 5.2].

Finally, we introduce a notion of derivative in infinite dimensions. This expression appears when computing the gradient of an energy in the Wasserstein-2 topology.

**Definition 7** (First Variation). For a map  $G : \mathcal{P}(\mathbb{R}^d) \mapsto \mathbb{R}$  and fixed probability distribution  $\rho \in \mathcal{P}(\mathbb{R}^d)$ , the first variation of  $G$  at the point  $\rho$  is denoted by  $\delta_\rho G[\rho] : \mathbb{R}^d \rightarrow \mathbb{R}$ , and is defined via the relation

$$\int \delta_\rho G[\rho](z)\psi(z)dz = \lim_{\epsilon \rightarrow 0} \frac{1}{\epsilon}(G(\rho + \epsilon\psi) - G(\rho))$$

for all  $\psi$  such that  $\int d\psi = 0$ , assuming that  $G$  is regular enough for all quantities to exist.

Using the first variation, we can express the gradient in Wasserstein-2 space, see for example [Vil03a, Exercise 8.8].

**Lemma 7.** The gradient of an energy  $G : \mathcal{P}_2(\mathbb{R}^d) \rightarrow \mathbb{R}$  in the Wasserstein-2 space is given by

$$\nabla_{W_1} G(\rho) = -\text{div}(\rho \nabla \delta_\rho G[\rho]).$$

As a consequence, the infinite dimensional steepest descent in Wasserstein-2 space can be expressed as the PDE

$$\partial_t \rho = -\nabla_{W_1} G(\rho) = \text{div}(\rho \nabla \delta_\rho G[\rho]). \quad (11)$$

All the coupled gradient flows considered in this work have this Wasserstein-2 structure.

### A.3 Steady states

The main goal in our theoretical analysis is to characterize the asymptotic behavior for the models (3), (4) and (5) as time goes to infinity. The steady states of these equations are the natural candidates to be asymptotic profiles for the corresponding equations. Thanks to the gradient flow structure, we expect to be able to make a connection between ground states of the energy functionals, and the steady state of the corresponding gradient flow dynamics. More precisely, any minimizer or maximizer is in particular a critical point of the energy, and therefore satisfies that the first variation is constant on disconnected components of the support. If this ground state also has enough regularity (weak differentiability) to be a solution to the equation, it immediately follows that it is in fact a steady state.

To make this connection precise, we first introduce what exactly we mean by a steady state.

**Definition 8** (Steady states for (3)). Given  $\rho_\infty \in L^1_+(\mathbb{R}^d) \cap L^\infty_{loc}(\mathbb{R}^d)$  with  $\|\rho_\infty\|_1 = 1$  and  $\mu_\infty \in \mathcal{P}_2(\mathbb{R}^d)$ , then  $(\rho_\infty, \mu_\infty)$  is a steady state for the system (3) if  $\rho_\infty \in W^{1,2}_{loc}(\mathbb{R}^d)$ ,  $\nabla W * \rho_\infty \in L^1_{loc}(\mathbb{R}^d)$ ,  $\rho_\infty$  is absolutely continuous with respect to  $\tilde{\rho}$ , and  $(\rho_\infty, \mu_\infty)$  satisfy

$$\nabla_z \left( \int f_1(z, x) d\mu_\infty(x) + \alpha \log \left( \frac{\rho_\infty(z)}{\tilde{\rho}(z)} \right) + W * \rho_\infty(z) \right) = 0 \quad \forall z \in \text{supp}(\rho_\infty), \quad (12a)$$

$$\nabla_x \left( \int f_1(z, x) d\rho_\infty(z) + \int f_2(z, x) d\tilde{\rho}(z) + \frac{\beta}{2} \|x - x_0\|^2 \right) = 0 \quad \forall x \in \text{supp}(\mu_\infty) \quad (12b)$$

in the sense of distributions.

**Definition 9** (Steady states for (4)). Let  $\rho_\infty \in L^1_+(\mathbb{R}^d) \cap L^\infty_{loc}(\mathbb{R}^d)$  with  $\|\rho_\infty\|_1 = 1$ . Then  $\rho_\infty$  is a steady state for the system (4) if  $\rho_\infty \in W^{1,2}_{loc}(\mathbb{R}^d)$ ,  $\nabla W * \rho_\infty \in L^1_{loc}(\mathbb{R}^d)$ ,  $\rho_\infty$  is absolutely continuous with respect to  $\tilde{\rho}$ , and  $\rho_\infty$  satisfies

$$\nabla_z \left( f_1(z, b(\rho_\infty)) - \alpha \log \left( \frac{\rho_\infty(z)}{\tilde{\rho}(z)} \right) - W * \rho_\infty(z) \right) = 0 \quad \forall z \in \mathbb{R}^d, \quad (13)$$

in the sense of distributions, where  $b(\rho_\infty) := \arg\min_x G_c(\rho_\infty, x)$ .

742 **Definition 10** (Steady states for (5)). *The vector  $x_\infty \in \mathbb{R}^d$  is a steady state for the system (5) if it satisfies*

$$\nabla_x G_d(x_\infty) = 0.$$

743 In fact, with the above notions of steady state, we can obtain improved regularity for  $\rho_\infty$ .

744 **Lemma 8.** *Assume  $\tilde{\rho} \in C^1(\mathbb{R}^d)$ . Then the steady states  $\rho_\infty$  for (3) and (4) are continuous.*

745 *Proof.* We present here the argument for equation (4) only. The result for (3) follows in exactly the same way  
746 by replacing  $f_1(z, b(\rho_\infty))$  with  $-\int f_1(z, x) d\mu_\infty(x)$ .

747 Thanks to our assumptions, we have  $f_1(\cdot, b(\rho_\infty)) + \alpha \log \tilde{\rho}(\cdot) \in C^1$ , which implies that  $\nabla(f_1(\cdot, b(\rho_\infty)) +$   
748  $\alpha \log \tilde{\rho}(\cdot)) \in L_{loc}^\infty$ . By the definition of a steady state,  $\rho_\infty \in L^1 \cap L_{loc}^\infty$  and thanks to Assumption 3 we have  
749  $W \in C^2$ , which implies that  $\nabla W * \rho_\infty \in L_{loc}^\infty$ . Let

$$h(z) := \rho_\infty(z) \nabla [f_1(z, b(\rho_\infty)) + \alpha \log \tilde{\rho}(z) - (W * \rho_\infty)(z)].$$

750 Then by the aforementioned regularity, we obtain  $h \in L_{loc}^1 \cap L_{loc}^\infty$ . By interpolation, it follows that  $h \in L_{loc}^p$  for  
751 all  $1 < p < \infty$ . This implies that  $\operatorname{div}(\rho_\infty h) \in W_{loc}^{-1,p}$ . Since  $\rho_\infty$  is a weak  $W_{loc}^{1,2}$ -solution of (13), we have

$$\Delta \rho_\infty = \operatorname{div}(\rho_\infty h),$$

752 and so by classic elliptic regularity theory we conclude  $\rho_\infty \in W_{loc}^{1,p}$ . Finally, applying Morrey's inequality, we  
753 have  $\rho_\infty \in C^{0,k}$  where  $k = \frac{p-d}{p}$  for any  $d < p < \infty$ . Therefore  $\rho_\infty \in C(\mathbb{R}^d)$  (after possibly being redefined  
754 on a set of measure zero).  $\square$

## 755 B Proof of Theorem 1

756 For ease of notation, we write  $G_a : \mathcal{P}(\mathbb{R}^d) \times \mathcal{P}(\mathbb{R}^d) \mapsto [0, \infty]$  as

$$G_a((\rho, \mu)) = \alpha KL(\rho|\tilde{\rho}) + \mathcal{V}(\rho, \mu) + \mathcal{W}(\rho),$$

757 where we define

$$\begin{aligned} \mathcal{V}(\rho, \mu) &= \iint f_1(z, x) d\rho(z) d\mu(x) + \int V(x) d\mu(x), \\ \mathcal{W}(\rho) &= \frac{1}{2} \iint W(z_1 - z_2) d\rho(z_1) d\rho(z_2), \end{aligned}$$

758 with potential given by  $V(x) := \int f_2(z, x) d\tilde{\rho}(z) + \frac{\beta}{2} \|x - x_0\|^2$ .

759 In order to prove the existence of a unique ground state for  $G_a$ , a natural approach is to consider the corresponding  
760 Euler-Lagrange equations

$$\alpha \log \frac{\rho(z)}{\tilde{\rho}(z)} + \int f_1(z, x) d\mu(x) + (W * \rho)(z) = c_1[\rho, \mu] \quad \text{for all } z \in \operatorname{supp}(\rho), \quad (14a)$$

$$\int f_1(z, x) d\rho(z) + V(x) = c_2[\rho, \mu] \quad \text{for all } x \in \operatorname{supp}(\mu), \quad (14b)$$

761 where  $c_1, c_2$  are constants that may differ on different connected components of  $\operatorname{supp}(\rho)$  and  $\operatorname{supp}(\mu)$ . These  
762 equations are not easy to solve explicitly, and we are therefore using general non-constructive techniques from  
763 calculus of variations. We first show continuity and convexity properties for the functional  $G_a$  (Lemma 9 and  
764 Proposition 10), essential properties that will allow us to deduce existence and uniqueness of ground states  
765 using the direct method in the calculus of variations (Proposition 11). Using the Euler-Lagrange equation 14,  
766 we then prove properties on the support of the ground state (Corollary 12). To obtain convergence results,  
767 we apply the HWI method: we first show a general 'interpolation' inequality between the energy, the energy  
768 dissipation and the metric (Proposition 13); this fundamental inequality will then imply a generalized logarithmic  
769 Sobolev inequality (Corollary 14) relating the energy to the energy dissipation, and a generalized Talagrand  
770 inequality (Corollary 15 that allows to translate convergence in energy into convergence in metric. Putting all  
771 these ingrediends together will then allow us to conclude for the statements in Theorem 1.

772 **Lemma 9.** *The functional  $G_a : \mathcal{P} \times \mathcal{P} \rightarrow \mathbb{R}$  is lower semi-continuous with respect to the weak-\* topology.*

773 *Proof.* We split the energy  $G_a$  into three parts: (i)  $KL(\rho|\tilde{\rho})$ , (ii) the interaction energy  $\mathcal{W}$ , and (iii) the potential  
774 energy  $\mathcal{V}$ . For (i), lower semi-continuity has been shown in [Pos75]. For (ii), we can directly apply [San15b,  
775 Proposition 7.2] using Assumption 3. For (iii), note that  $V$  and  $f_1$  are lower semi-continuous and bounded below  
776 thanks to Assumption 1, and so the result follows from [San15b, Proposition 7.1].  $\square$

777 **Proposition 10** (Uniform displacement convexity). *Let  $\alpha > 0$  and  $\beta > 0$ . Fix  $\gamma_0, \gamma_1 \in \mathcal{P}_2 \times \mathcal{P}_2$  and let*  
 778 *Assumptions 1, 2 and 3 hold. Along any geodesic  $(\gamma_s)_{s \in [0,1]} \in \mathcal{P}_2 \times \mathcal{P}_2$  connecting  $\gamma_0$  to  $\gamma_1$ , we have for all*  
 779  *$s \in [0, 1]$*

$$\frac{d^2}{ds^2} G_a(\gamma_s) \geq \eta \overline{W}(\gamma_0, \gamma_1)^2, \quad \eta := \lambda_1 + \min(\lambda_2 + \beta, \alpha \tilde{\lambda}). \quad (15)$$

780 *As a result, the functional  $G_a : \mathcal{P} \times \mathcal{P} \rightarrow \mathbb{R}$  is uniformly displacement convex with constant  $\eta > 0$ .*

781 *Proof.* Let  $\gamma_0$  and  $\gamma_1$  be two probability measures with bounded second moments. Denote by  $\phi, \psi : \mathbb{R}^d \rightarrow \mathbb{R}$   
 782 the optimal Kantorovich potentials pushing  $\rho_0$  onto  $\rho_1$ , and  $\mu_0$  onto  $\mu_1$ , respectively:

$$\begin{aligned} \rho_1 &= \nabla \phi_{\#} \rho_0 \quad \text{such that} \quad W_2(\rho_0, \rho_1)^2 = \int_{\mathbb{R}^d} \|z - \nabla \phi(z)\|^2 d\rho_0(z), \\ \mu_1 &= \nabla \psi_{\#} \mu_0 \quad \text{such that} \quad W_2(\mu_0, \mu_1)^2 = \int_{\mathbb{R}^d} \|x - \nabla \psi(x)\|^2 d\mu_0(x). \end{aligned}$$

783 The now classical results in [BB00] guarantee that there always exists convex functions  $\phi, \psi$  that satisfy the  
 784 conditions above. Then the path  $(\gamma_s)_{s \in [0,1]} = (\rho_s, \mu_s)_{s \in [0,1]}$  defined by

$$\begin{aligned} \rho_s &= [(1-s) \text{id} + s \nabla_z \phi]_{\#} \rho_0, \\ \mu_s &= [(1-s) \text{id} + s \nabla_x \psi]_{\#} \mu_0 \end{aligned}$$

785 is a  $\overline{W}$ -geodesic from  $\gamma_0$  to  $\gamma_1$ .

786 The first derivative of  $\mathcal{V}$  along geodesics in the Wasserstein metric is given by

$$\begin{aligned} \frac{d}{ds} \mathcal{V}(\gamma_s) &= \frac{d}{ds} \left[ \iint f_1((1-s)z + s \nabla \phi(z), (1-s)x + s \nabla \psi(x)) d\rho_0(z) d\mu_0(x) \right. \\ &\quad \left. + \int V((1-s)x + s \nabla \psi(x)) d\mu_0(x) \right] \\ &= \iint \nabla_x f_1((1-s)z + s \nabla \phi(z), (1-s)x + s \nabla \psi(x)) \cdot (\nabla \psi(x) - x) d\rho_0(z) d\mu_0(x) \\ &\quad + \iint \nabla_z f_1((1-s)z + s \nabla \phi(z), (1-s)x + s \nabla \psi(x)) \cdot (\nabla \phi(z) - z) d\rho_0(z) d\mu_0(x) \\ &\quad + \int \nabla_x V((1-s)x + s \nabla \psi(x)) \cdot (\nabla \psi(x) - x) d\mu_0(x), \end{aligned}$$

787 and taking another derivative we have

$$\begin{aligned} \frac{d^2}{ds^2} \mathcal{V}(\gamma_s) &= - \iint \left[ \frac{(\nabla \psi(x) - x)}{(\nabla \phi(z) - z)} \right]^T \cdot D_s(z, x) \cdot \left[ \frac{(\nabla \psi(x) - x)}{(\nabla \phi(z) - z)} \right] d\rho_0(z) d\mu_0(x) \\ &\quad + \iint (\nabla \psi(x) - x)^T \cdot \nabla_x^2 V((1-s)x + s \nabla \psi(x)) \cdot (\nabla \psi(x) - x) d\rho_0(z) d\mu_0(x) \\ &\geq \lambda_1 \overline{W}(\gamma_0, \gamma_1)^2 + (\lambda_2 + \beta) W_2(\mu_0, \mu_1)^2, \end{aligned}$$

788 where we denoted  $D_s(z, x) := \text{Hess}(f_1)((1-s)z + s \nabla \phi(z), (1-s)x + s \nabla \psi(x))$ , and the last inequality  
 789 follows from Assumption 1 and the optimality of the potentials  $\phi$  and  $\psi$ .

790 Following [CMV03; Vil03b] and using Assumption 2, the second derivatives of the diffusion term and the  
 791 interaction term along geodesics are given by

$$\frac{d^2}{ds^2} KL(\rho_s | \tilde{\rho}) \geq \alpha \tilde{\lambda} W_2(\rho_0, \rho_1)^2, \quad \frac{d^2}{ds^2} \mathcal{W}(\rho_s) \geq 0. \quad (16)$$

792 Putting the above estimates together, we obtain (15).

793 □

794 **Remark 5.** *Alternatively, one could assume strong convexity of  $W$ , which would improve the lower-bound on*  
 795 *the second derivative along geodesics.*

796 **Proposition 11.** (Ground state) *Let Assumptions 1-3 hold for  $\alpha, \beta > 0$ . Then the functional  $G_a : \mathcal{P}(\mathbb{R}^d) \times$*   
 797  *$\mathcal{P}(\mathbb{R}^d) \rightarrow [0, \infty]$  admits a unique minimizer  $\gamma_* = (\rho_*, \mu_*)$ , and it satisfies  $\rho_* \in \mathcal{P}_2(\mathbb{R}^d) \cap L^1(\mathbb{R}^d)$ ,  $\mu_* \in$*   
 798  *$\mathcal{P}_2(\mathbb{R}^d)$ , and  $\rho_*$  is absolutely continuous with respect to  $\tilde{\rho}$ .*

799 *Proof.* We show existence of a minimizer of  $G_a$  using the direct method in the calculus of variations. Denote by  
800  $\gamma = (\rho, \mu) \in \mathcal{P} \times \mathcal{P} \subset \mathcal{M} \times \mathcal{M}$  a pair of probability measures as a point in the product space of Radon measures.  
801 Since  $G_a \geq 0$  on  $\mathcal{P} \times \mathcal{P}$  (see Assumption 1) and not identically  $+\infty$  everywhere, there exists a minimizing  
802 sequence  $(\gamma_n) \in \mathcal{P} \times \mathcal{P}$ . Note that  $(\gamma_n)$  is in the closed unit ball of the dual space of continuous functions  
803 vanishing at infinity  $(C_0(\mathbb{R}^d) \times C_0(\mathbb{R}^d))^*$  endowed with the dual norm  $\|\gamma_n\|_* = \sup \frac{|\int f d\rho_n + \int g d\mu_n|}{\|(f, g)\|_\infty}$  over  
804  $f, g \in C_0(\mathbb{R}^d)$  with  $\|(f, g)\|_\infty := \|f\|_\infty + \|g\|_\infty \neq 0$ . By the Banach-Alaoglu theorem [Rud91, Thm 3.15]  
805 there exists a limit  $\gamma_* = (\rho_*, \mu_*) \in \mathcal{M} \times \mathcal{M} = (C_0 \times C_0)^*$  and a convergent subsequence (not relabelled)  
806 such that  $\gamma_n \xrightarrow{*} \gamma_*$ . In fact,  $\rho_*$  is absolutely continuous with respect to  $\tilde{\rho}$  implying  $\rho_* \in L^1(\mathbb{R}^d)$  thanks to  
807 Assumption 2. Further,  $\mu_*$  has bounded second moment, else we would have  $\inf_{\gamma \in \mathcal{P} \times \mathcal{P}} G_a(\gamma) = \infty$  which  
808 yields a contradiction. It remains to show that  $\int d\rho_* = \int d\mu_* = 1$  to conclude that  $\gamma_* \in \mathcal{P} \times \mathcal{P}$ . To this  
809 aim, it is sufficient to show tightness of  $(\rho_n)$  and  $(\mu_n)$ , preventing the escape of mass to infinity as we have  
810  $\int d\rho_n = \int d\mu_n = 1$  for all  $n \geq 1$ . Tightness follows from Markov's inequality [Gho02] if we can establish  
811 uniform bounds on the second moments, i.e. we want to show that there exists a constant  $C > 0$  independent of  
812  $n$  such that

$$\int \|z\|^2 d\rho_n(z) + \int \|x\|^2 d\mu_n(x) < C \quad \forall n \in \mathbb{N}. \quad (17)$$

813 To establish (17), observe that thanks to Assumption 2, there exists a constant  $c_0 \in \mathbb{R}$  (possibly negative) such  
814 that  $-\log \tilde{\rho}(z) \geq c_0 + \frac{\tilde{\lambda}}{4} \|z\|^2$  for all  $z \in \mathbb{R}^d$ . Then

$$\frac{\alpha \tilde{\lambda}}{4} \int \|z\|^2 d\rho_n \leq -\alpha c_0 - \alpha \int \log \tilde{\rho}(z) d\rho_n$$

815 Therefore, using  $\int d\rho_n = \int d\mu_n = 1$  and writing  $\zeta := \min\{\frac{\alpha \tilde{\lambda}}{4}, \frac{\beta}{2}\} > 0$ , we obtain the desired uniform upper  
816 bound on the second moments of the minimizing sequence,

$$\begin{aligned} \zeta \iint (\|z\|^2 + \|x\|^2) d\rho_n d\mu_n &\leq -\alpha c_0 - \alpha \int \log \tilde{\rho}(z) d\rho_n + \beta \int \|x - x_0\|^2 d\mu_n + \beta \|x_0\|^2 \\ &\leq -\alpha c_0 + \beta \|x_0\|^2 + G_a(\gamma_n) \\ &\leq -\alpha c_0 + \beta \|x_0\|^2 + G_a(\gamma_1) < \infty. \end{aligned}$$

817 This concludes the proof that the limit  $\gamma_*$  satisfies indeed  $\gamma_* \in \mathcal{P} \times \mathcal{P}$ , and indeed  $\rho_* \in \mathcal{P}_2(\mathbb{R}^d)$  as well. Finally,  
818  $\gamma_*$  is indeed a minimizer of  $G_a$  thanks to weak-\* lower-semicontinuity of  $G_a$  following Lemma 9.

819 Next we show uniqueness using a contradiction argument. Suppose  $\gamma_* = (\rho_*, \mu_*)$  and  $\gamma'_* = (\rho'_*, \mu'_*)$  are  
820 minimizers of  $G_a$ . For  $t \in [0, 1]$ , define  $\gamma_t := ((1-t)\text{id} + tT, (1-t)\text{id} + tS)_\# \gamma_*$ , where  $T, S : \mathbb{R}^d \mapsto \mathbb{R}^d$   
821 are the optimal transport maps such that  $\rho'_* = T_\# \rho_*$  and  $\mu'_* = S_\# \mu_*$ . By Proposition 10 the energy  $G_a$  is  
822 uniformly displacement convex, and so we have

$$G_a(\gamma_t) \leq (1-t)G_a(\gamma_*) + tG_a(\gamma'_*) = G_a(\gamma_*).$$

823 If  $\gamma_* \neq \gamma'_*$  and  $t \in (0, 1)$ , then strict inequality holds by applying similar arguments as in [McC97, Proposition  
824 1.2]. However, if  $\gamma_* \neq \gamma'_*$ , the strict inequality  $G_a(\gamma_t) < G_a(\gamma_*)$  is a contradiction to the minimality of  $\gamma_*$ .  
825 Hence, the minimizer is unique.  $\square$

826 **Remark 6.** If  $\lambda_1 > 0$ , then the strict convexity of  $f_1$  can be used to deduce uniqueness, and the assumptions on  
827  $-\log \tilde{\rho}$  can be weakened from strict convexity to convexity.

828 **Corollary 12.** Any minimizer  $\gamma_* = (\rho_*, \mu_*)$  of  $G_a$  is a steady state for equation (3) according to Definition 8  
829 and satisfies  $\text{supp}(\rho_*) = \text{supp}(\tilde{\rho})$ .

830 *Proof.* By Proposition 11, we have  $\rho_* \in L^1_+$ ,  $\|\rho_*\|_1 = 1$ ,  $\mu_* \in \mathcal{P}_2$  and that  $\rho_*$  is absolutely continuous with  
831 respect to  $\tilde{\rho}$ . Since  $W \in C^2(\mathbb{R}^d)$ , it follows that  $\nabla W * \rho_* \in L^1_{loc}$ . In order to show that  $\gamma_*$  is a steady state for  
832 equation (3), it remains to prove that  $\rho_* \in W^{1,2}_{loc} \cap L^\infty_{loc}$ . As  $\gamma_*$  is a minimizer, it is in particular a critical point,  
833 and therefore satisfies equations (14). Rearranging, we obtain (for a possible different constant  $c_1[\rho_*, \mu_*] \neq 0$ )  
834 from (14a) that

$$\rho_*(z) = c_1[\rho_*, \mu_*] \tilde{\rho}(z) \exp \left[ -\frac{1}{\alpha} \left( \int f_1(z, x) \mu_*(x) + W * \rho_*(z) \right) \right] \quad \text{on } \text{supp}(\rho_*). \quad (18)$$

835 Then for any compact set  $K \subset \mathbb{R}^d$ ,

$$\sup_{z \in K} \rho_*(z) \leq c_1[\rho_*, \mu_*] \sup_{z \in K} \tilde{\rho}(z) \sup_{z \in K} \exp \left( -\frac{1}{\alpha} \left( \int f_1(z, x) \mu_*(x) \right) \right) \sup_{z \in K} \exp \left( -\frac{1}{\alpha} W * \rho_*(z) \right).$$

836 As  $f_1 \geq 0$  by Assumption 1 and  $W \geq 0$  by Assumption 3, the last two terms are finite. The first supremum  
837 is finite thanks to continuity of  $\tilde{\rho}$ . Therefore  $\rho_* \in L^\infty_{loc}$ . To show that  $\rho_* \in W^{1,2}_{loc}$ , note that for any compact

838 set  $K \subset \mathbb{R}^d$ , we have  $\int_K |\rho_*(z)|^2 dz < \infty$  as a consequence of  $\rho_* \in L_{loc}^\infty$ . Moreover, defining  $T[\gamma](z) :=$   
839  $-\frac{1}{\alpha} \left( \int f_1(z, x) \mu(x) + W * \rho(z) \right) \leq 0$ , we have

$$\begin{aligned} \int_K |\nabla \rho_*|^2 dz &= c_1 [\rho_*, \mu_*]^2 \int_K |\nabla \tilde{\rho} + \tilde{\rho} \nabla T[\gamma_*]|^2 \exp(2T[\gamma_*]) dz \\ &\leq 2c_1 [\rho_*, \mu_*]^2 \int_K |\nabla \tilde{\rho}|^2 \exp(2T[\gamma_*]) dz + 2c_1 [\rho_*, \mu_*]^2 \int_K |\nabla T[\gamma_*]|^2 \tilde{\rho}^2 \exp(2T[\gamma_*]) dz, \end{aligned}$$

840 which is bounded noting that  $\exp(2T[\gamma_*]) \leq 1$  and that  $T[\gamma_*](\cdot)$ ,  $\nabla T[\gamma_*](\cdot)$  and  $\nabla \tilde{\rho}$  are in  $L_{loc}^\infty$ , where we used  
841 that  $f_1(\cdot, x)$ ,  $W(\cdot)$ ,  $\tilde{\rho}(\cdot) \in C^1(\mathbb{R}^d)$  by Assumptions 1-3. We conclude that  $\rho_* \in W_{loc}^{1,2}$ , and indeed  $(\rho_*, \mu_*)$   
842 solves (12) in the sense of distributions as a consequence of (14).

Next, we show that  $\text{supp}(\rho_*) = \text{supp}(\tilde{\rho})$  using again the relation (18). Firstly, note that  $\text{supp}(\rho_*) \subset \text{supp}(\tilde{\rho})$  since  $\rho_*$  is absolutely continuous with respect to  $\tilde{\rho}$ . Secondly, we claim that  $\exp\left[-\frac{1}{\alpha} \left( \int f_1(z, x) \mu_*(x) + W * \rho_*(z) \right)\right] > 0$  for all  $z \in \mathbb{R}^d$ . In other words, we claim that  $\int f_1(z, x) \mu_*(x) < \infty$  and  $W * \rho_*(z) < \infty$  for all  $z \in \mathbb{R}^d$ . Indeed, for the first term, fix any  $z \in \mathbb{R}^d$  and choose  $R > 0$  large enough such that  $z \in B_R(0)$ . Then, thanks to continuity of  $f_1$  according to Assumption 1, we have

$$\int f_1(z, x) \mu_*(x) \leq \sup_{z \in B_R(0)} \int f_1(z, x) \mu_*(x) < \infty.$$

843 For the second term, note that by Assumption 3, we have for any  $z \in \mathbb{R}^d$  and  $\epsilon > 0$ ,

$$\begin{aligned} W(z) &\leq W(0) + \nabla W(z) \cdot z \leq W(0) + \frac{1}{2\epsilon} \|\nabla W(z)\|^2 + \frac{\epsilon}{2} \|z\|^2 \\ &\leq W(0) + \frac{D^2}{2\epsilon} (1 + \|z\|)^2 + \frac{\epsilon}{2} \|z\|^2 \leq W(0) + \frac{D^2}{\epsilon} + \left( \frac{D^2}{\epsilon} + \frac{\epsilon}{2} \right) \|z\|^2 \\ &= W(0) + \frac{D}{\sqrt{2}} + \sqrt{2}D \|z\|^2, \end{aligned}$$

844 where the last equality follows by choosing the optimal  $\epsilon = \sqrt{2}D$ . We conclude that

$$\begin{aligned} W * \rho_*(z) &\leq W(0) + \frac{D}{\sqrt{2}} + \sqrt{2}D \int \|z - \tilde{z}\|^2 \rho_*(\tilde{z}) \\ &\leq W(0) + \frac{D}{\sqrt{2}} + 2\sqrt{2}D \|z\|^2 + 2\sqrt{2}D \int \|\tilde{z}\|^2 \rho_*(\tilde{z}), \end{aligned} \quad (19)$$

845 which is finite for any fixed  $z \in \mathbb{R}^d$  thanks to the fact that  $\rho_* \in \mathcal{P}_2(\mathbb{R}^d)$ . Hence,  $\text{supp}(\rho_*) = \text{supp}(\tilde{\rho})$ .  $\square$

846 **Remark 7.** If we have in addition that  $\tilde{\rho} \in L^\infty(\mathbb{R}^d)$ , then the minimizer  $\rho_*$  of  $G_a$  is in  $L^\infty(\mathbb{R}^d)$  as well. This  
847 follows directly by bounding the right-hand side of (18).

848 The following inequality is referred to as HWI inequality and represents the key result to obtain convergence to  
849 equilibrium.

850 **Proposition 13** (HWI inequality). *Define the dissipation functional*

$$D_a(\gamma) := \iint |\delta_\gamma G_a(z, x)|^2 d\gamma(z, x).$$

851 Assume  $\alpha, \beta > 0$  and let  $\eta$  as defined in (15). Let  $\gamma_0, \gamma_1 \in \mathcal{P}_2 \times \mathcal{P}_2$  such that  $G_a(\gamma_0), G_a(\gamma_1), D_a(\gamma_0) < \infty$ .  
852 Then

$$G_a(\gamma_0) - G_a(\gamma_1) \leq \overline{W}(\gamma_0, \gamma_1) \sqrt{D_a(\gamma_0)} - \frac{\eta}{2} \overline{W}(\gamma_0, \gamma_1)^2 \quad (20)$$

853 *Proof.* For simplicity, consider  $\gamma_0, \gamma_1$  that have smooth Lebesgue densities of compact support. The general  
854 case can be recovered using approximation arguments. Let  $(\gamma_s)_{s \in [0,1]}$  denote a  $\overline{W}$ -geodesic between  $\gamma_0, \gamma_1$ .  
855 Following similar arguments as in [CMV03] and [OV00, Section 5] and making use of the calculations in the  
856 proof of Proposition 10, we have

$$\left. \frac{d}{ds} G_a(\gamma_s) \right|_{s=0} \geq \iint \begin{bmatrix} \xi_1(z) \\ \xi_2(x) \end{bmatrix} \cdot \begin{bmatrix} (\nabla \phi(z) - z) \\ (\nabla \psi(x) - x) \end{bmatrix} d\gamma_0(z, x),$$

857 where

$$\begin{aligned} \xi_1[\gamma_0](z) &:= \alpha \nabla_z \log \left( \frac{\rho_0(z)}{\tilde{\rho}(z)} \right) + \int \nabla_z f_1(z, x) d\mu_0(x) + \int \nabla_z W(z - z') d\rho_0(z'), \\ \xi_2[\gamma_0](x) &:= \int \nabla_x f_1(z, x) d\rho_0(z) + \nabla_x V(x). \end{aligned}$$

Note that the dissipation functional can then be written as

$$D_a(\gamma_0) = \iint (|\xi_1(z)|^2 + |\xi_2(x)|^2) d\gamma_0(z, x).$$

Using the double integral Cauchy-Schwarz inequality [Ste04], we obtain

$$\begin{aligned} \left. \frac{d}{ds} G_a(\gamma_s) \right|_{s=0} &\geq - \left( \sqrt{\iint \left\| \begin{bmatrix} \xi_1 \\ \xi_2 \end{bmatrix} \right\|_2^2 d\gamma_0} \right) \left( \sqrt{\iint \left\| \begin{bmatrix} \nabla \phi(z) - z \\ \nabla \psi(x) - x \end{bmatrix} \right\|_2^2 d\gamma_0} \right) \\ &= -\sqrt{D_a(\gamma_0)} \sqrt{\int \|\nabla \phi(z) - z\|^2 d\rho_0 + \int \|\nabla \psi(x) - x\|^2 d\mu_0} \\ &= -\sqrt{D_a(\gamma_0)} \overline{W}(\gamma_0, \gamma_1). \end{aligned}$$

Next, we compute a Taylor expansion of  $G_a(\gamma_s)$  when considered as a function in  $s$  and use the bound on

$\frac{d^2}{ds^2} G_a$  from (15):

$$\begin{aligned} G_a(\gamma_1) &= G_a(\gamma_0) + \left. \frac{d}{ds} G_a(\gamma_s) \right|_{s=0} + \int_0^1 (1-t) \left( \left. \frac{d^2}{ds^2} G_a(\gamma_s) \right|_{s=t} \right) dt \\ &\geq G_a(\gamma_0) - \sqrt{D_a(\gamma_0)} \overline{W}(\gamma_0, \gamma_1) + \frac{\eta}{2} \overline{W}(\gamma_0, \gamma_1)^2. \end{aligned}$$

□

**Remark 8.** The HWI inequality in Proposition 13 immediately implies uniqueness of minimizers for  $G_a$  in the set  $\{\gamma \in \mathcal{P} \times \mathcal{P} : D_a(\gamma) < +\infty\}$ . Indeed, if  $\gamma_0$  is such that  $D_a(\gamma_0) = 0$ , then for any other  $\gamma_1$  in the above set we have  $G_a(\gamma_0) \leq G_a(\gamma_1)$  with equality if and only if  $\overline{W}(\gamma_0, \gamma_1) = 0$ .

**Corollary 14** (Generalized Log-Sobolev inequality). Denote by  $\gamma_*$  the unique minimizer of  $G_a$ . With  $\eta$  as defined in (15), any product measure  $\gamma \in \mathcal{P}_2 \times \mathcal{P}_2$  such that  $G(\gamma), D_a(\gamma) < \infty$  satisfies

$$D_a(\gamma) \geq 2\eta G_a(\gamma | \gamma_*). \quad (21)$$

*Proof.* This statement follows immediately from Proposition 13. Indeed, let  $\gamma_1 = \gamma_*$  and  $\gamma_0 = \gamma$  in (20). Then

$$\begin{aligned} G_a(\gamma | \gamma_*) &\leq \overline{W}(\gamma, \gamma_*) \sqrt{D_a(\gamma)} - \frac{\eta}{2} \overline{W}(\gamma, \gamma_*)^2 \\ &\leq \max_{t \geq 0} \left( \sqrt{D_a(\gamma)} t - \frac{\eta}{2} t^2 \right) = \frac{D_a(\gamma)}{2\eta}. \end{aligned}$$

□

**Corollary 15** (Talagrand inequality). Denote by  $\gamma_*$  the unique minimizer of  $G_a$ . With  $\eta$  as defined in (15), it holds

$$\overline{W}(\gamma, \gamma_*)^2 \leq \frac{2}{\eta} G_a(\gamma | \gamma_*)$$

for any  $\gamma \in \mathcal{P}_2 \times \mathcal{P}_2$  such that  $G_a(\gamma) < \infty$ .

*Proof.* This is also a direct consequence of Proposition 13 by setting  $\gamma_0 = \gamma_*$  and  $\gamma_1 = \gamma$ . Then  $G_a(\gamma_*) < \infty$  and  $D_a(\gamma_*) = 0$ , and the result follows. □

*Proof of Theorem 1.* The entropy term  $\int \rho \log \rho$  produces diffusion in  $\rho$  for the corresponding PDE in (3). As a consequence, solutions  $\rho_t$  to (3) and minimizers  $\rho^*$  for  $G_a$  have to be  $L^1$  functions. As there is no diffusion for the evolution of  $\mu_t$ , solutions may have a singular part. In fact, for initial condition  $\mu_0 = \delta_{x_0}$ , the corresponding solution will be of the form  $\mu_t = \delta_{x(t)}$ , where  $x(t)$  solves the ODE (2) with initial condition  $x_0$ . This follows from the fact that the evolution for  $\mu_t$  is a transport equation (also see Section A.1 for more details). Results (a) and (b) are the statements in Proposition 11, Corollary 12 and Corollary 15. To obtain (c), we differentiate the energy  $G_a$  along solutions  $\gamma_t$  to the equation (3):

$$\begin{aligned} \frac{d}{dt} G_a(\gamma_t) &= \int \delta_\rho G_a[\gamma_t](z) \partial_t \rho_t dz + \int \delta_\mu G_a[\gamma_t](x) \partial_t \mu_t dx \\ &= - \int \|\nabla_z \delta_\rho G_a[\gamma_t](z)\|^2 d\rho_t(z) - \int \|\nabla_x \delta_\mu G_a[\gamma_t](x)\|^2 d\mu_t(x) \\ &= -D_a(\gamma_t) \leq -2\eta G_a(\gamma_t | \gamma_*), \end{aligned}$$

where the last bound follows from Corollary 14. Applying Gronwall's inequality, we immediately obtain decay in energy,

$$G_a(\gamma_t | \gamma_*) \leq e^{-2\eta t} G_a(\gamma_0 | \gamma_*).$$

Finally, applying Talagrand's inequality (Corollary 15), the decay in energy implies decay in the product Wasserstein metric,

$$\overline{W}(\gamma_t, \gamma_*) \leq ce^{-\eta t}$$

where  $c > 0$  is a constant only depending on  $\gamma_0, \gamma_*$  and the parameter  $\eta$ .  $\square$

## C Proof of Theorem 2

In the case of competing objectives, we rewrite the energy  $G_c(\rho, x) : \mathcal{P}(\mathbb{R}^d) \times \mathbb{R}^d \mapsto [-\infty, \infty]$  as follows:

$$G_c(\rho, x) = \int f_1(z, x) d\rho(z) + \int f_2(z, x) d\bar{\rho}(z) + \frac{\beta}{2} \|x - x_0\|^2 - P(\rho),$$

where

$$P(\rho) := \alpha KL(\rho | \bar{\rho}) + \frac{1}{2} \int \rho W * \rho.$$

Note that for any fixed  $\rho \in \mathcal{P}$ , the energy  $G_c(\rho, \cdot)$  is strictly convex in  $x$ , and therefore has a unique minimizer. Define the best response by

$$b(\rho) := \operatorname{argmin}_{\bar{x}} G_c(\rho, \bar{x})$$

and denote  $G_b(\rho) := G_c(\rho, b(\rho))$ . We begin with an auxiliary result computing the first variations of the different terms in  $G_b(\rho)$  using Definition A.2.

**Lemma 16** (First variation of  $G_b$ ). *The first variation of  $G_b$  is given by*

$$\delta_\rho G_b[\rho](z) = h_1(z) + h_2(z) + \beta h_3(z) - \delta_\rho P[\rho](z),$$

where

$$\begin{aligned} h_1(z) &:= \frac{\delta}{\delta \rho} \left( \int f_1(\tilde{z}, b(\rho)) d\rho(\tilde{z}) \right) (z) = \left\langle \int \nabla_x f_1(\tilde{z}, b(\rho)) d\rho(\tilde{z}), \frac{\delta b}{\delta \rho}[\rho](z) \right\rangle + f_1(z, b(\rho)), \\ h_2(z) &:= \frac{\delta}{\delta \rho} \left( \int f_2(\tilde{z}, b(\rho)) d\bar{\rho}(\tilde{z}) \right) (z) = \left\langle \int \nabla_x f_2(\tilde{z}, b(\rho)) d\bar{\rho}(\tilde{z}), \frac{\delta b}{\delta \rho}[\rho](z) \right\rangle, \\ h_3(z) &:= \frac{1}{2} \frac{\delta}{\delta \rho} \|b(\rho) - x_0\|^2 = \left\langle b(\rho) - x_0, \frac{\delta b}{\delta \rho}[\rho](z) \right\rangle, \end{aligned}$$

and

$$\delta_\rho P[\rho](z) = \alpha \log(\rho(z)/\bar{\rho}(z)) + (W * \rho)(z).$$

*Proof.* We begin with general expressions for Taylor expansions of  $b : \mathcal{P}(\mathbb{R}^d) \rightarrow \mathbb{R}^d$  and  $f_i(z, b(\cdot)) : \mathcal{P}(\mathbb{R}^d) \rightarrow \mathbb{R}$  for  $i = 1, 2$  around  $\rho$ . Let  $\psi \in \mathcal{T}$  with  $\mathcal{T} = \{\psi : \int \psi(z) dz = 0\}$ . Then

$$b(\rho + \epsilon \psi) = b(\rho) + \epsilon \int \frac{\delta b}{\delta \rho}[\rho](z') \psi(z') dz' + O(\epsilon^2) \quad (22)$$

and

$$f_i(z, b(\rho + \epsilon \psi)) = f_i(z, b(\rho)) + \epsilon \left\langle \nabla_x f_i(z, b(\rho)), \int \frac{\delta b}{\delta \rho}[\rho](z') \psi(z') dz' \right\rangle + O(\epsilon^2). \quad (23)$$

We compute explicitly each of the first variations:

(i) Using (23), we have

$$\begin{aligned} \int \psi(z) h_1(z) dz &= \lim_{\epsilon \rightarrow 0} \frac{1}{\epsilon} \left[ \int f_1(z, b(\rho + \epsilon \psi)) (\rho(z) + \epsilon \psi(z)) dz - \int f_1(z, b(\rho)) \rho(z) dz \right] \\ &= \left\langle \int \nabla_x f_1(z, b(\rho)) d\rho(z), \int \frac{\delta b(\rho)}{\delta \rho}[\rho](z') \psi(z') dz' \right\rangle + \int f_1(z, b(\rho)) \psi(z) dz \\ &= \int \left\langle \int \nabla_x f_1(z, b(\rho)) d\rho(z), \frac{\delta b(\rho)}{\delta \rho}[\rho](z') \right\rangle \psi(z') dz' + \int f_1(z, b(\rho)) \psi(z) dz \\ &\Rightarrow h_1(z) = \left\langle \int \nabla_x f_1(\tilde{z}, b(\rho)) d\rho(\tilde{z}), \frac{\delta b}{\delta \rho}[\rho](z) \right\rangle + f_1(z, b(\rho)). \end{aligned}$$



897 (ii) Similarly, using again (23),

$$\begin{aligned} \int \psi(z) h_2(z) dz &= \lim_{\epsilon \rightarrow 0} \frac{1}{\epsilon} \left[ \int f_2(z, b(\rho + \epsilon \psi)) d\bar{\rho}(z) - \int f_2(z, b(\rho)) \bar{\rho}(z) dz \right] \\ &= \int \left\langle \int \nabla_x f_2(\tilde{z}, b(\rho)) d\bar{\rho}(\tilde{z}), \frac{\delta b}{\delta \rho}[\rho](z) \right\rangle \psi(z) dz \\ &\Rightarrow h_2(z) = \left\langle \int \nabla_x f_2(\tilde{z}, b(\rho)) d\bar{\rho}(\tilde{z}), \frac{\delta b}{\delta \rho}[\rho](z) \right\rangle. \end{aligned}$$

898 (iii) Finally, from (22) it follows that

$$\begin{aligned} \int \psi(z) h_3(z) dz &= \lim_{\epsilon \rightarrow 0} \frac{1}{2\epsilon} \left[ \langle b(\rho + \epsilon \psi) - x_0, b(\rho + \epsilon \psi) - x_0 \rangle - \langle b(\rho) - x_0, b(\rho) - x_0 \rangle \right] \\ &= \int \left\langle b(\rho) - x_0, \frac{\delta b}{\delta \rho}[\rho](z) \right\rangle \psi(z) dz \\ &\Rightarrow h_3(z) = \left\langle b(\rho) - x_0, \frac{\delta b}{\delta \rho}[\rho](z) \right\rangle. \end{aligned}$$

899 Finally, the expression for  $\delta_\rho P[\rho]$  follows by direct computation □

900 **Lemma 17.** Denote  $G_b(\rho) := G_c(\rho, b(\rho))$  with  $b(\rho)$  given by (4). Then  $\delta_\rho G_b[\rho] = \delta_\rho G_c[\rho]|_{x=b(\rho)}$ .

901 *Proof.* We start by computing  $\delta_\rho G_c(\cdot, x)[\rho](z)$  for any  $z, x \in \mathbb{R}^d$ :

$$\delta_\rho G_c(\cdot, x)[\rho](z) = f_1(z, x) - \delta_\rho P[\rho](z). \quad (24)$$

902 Next, we compute  $\delta_\rho G_b$ . Using Lemma 16, the first variation of  $G_b$  is given by

$$\begin{aligned} \delta_\rho G_b[\rho](z) &= h_1(z) + h_2(z) + \beta h_3(z) - \delta_\rho P[\rho](z) \\ &= - \left\langle \left[ \int \nabla_x f_1(\tilde{z}, b(\rho)) d\rho(\tilde{z}) + \int \nabla_x f_2(\tilde{z}, b(\rho)) d\bar{\rho}(\tilde{z}) + \beta(b(\rho) - x_0) \right], \delta_\rho b[\rho](z) \right\rangle \\ &\quad + f_1(z, b(\rho)) - \delta_\rho P[\rho](z). \end{aligned}$$

903 Note that

$$\nabla_x G_c(\rho, x) = \int \nabla_x f_1(\tilde{z}, x) d\rho(\tilde{z}) + \int \nabla_x f_2(\tilde{z}, x) d\bar{\rho}(\tilde{z}) + \beta(x - x_0), \quad (25)$$

904 and by the definition of the best response  $b(\rho)$ , we have  $\nabla_x G_c(\rho, x)|_{x=b(\rho)} = 0$ . Substituting into the expression  
905 for  $\delta_\rho G_b$  and using (24), we obtain

$$\delta_\rho G_b[\rho](z) = f_1(z, b(\rho)) - \delta_\rho P[\rho](z) = \delta_\rho G_c(\cdot, x)[\rho](z) \Big|_{x=b(\rho)}.$$

906 This concludes the proof. □

907 **Lemma 18** (Uniform boundedness of the best response). Let Assumption 1 hold. Then for any  $\rho \in \mathcal{P}(\mathbb{R}^d)$ , we  
908 have

$$\|b(\rho)\|^2 \leq \|x_0\|^2 + \frac{2(a_1 + a_2)}{\beta}.$$

*Proof.*

$$\int \nabla_x f_1(z, b(\rho)) d\rho_t + \int \nabla_x f_2(z, b(\rho)) d\bar{\rho}(z) + \beta(b(\rho) - x_0) = 0.$$

909 To show that  $b(\rho)$  is uniformly bounded, we take the inner product of the above expression with  $b(\rho)$  itself

$$\beta \|b(\rho)\|^2 = \beta x_0 \cdot b(\rho) - \int \nabla_x f_1(z, b(\rho)) \cdot b(\rho) d\rho(z) - \int \nabla_x f_2(z, b(\rho)) \cdot b(\rho) d\bar{\rho}(z).$$

910 Using Assumption 1 to bound the two integrals, together with using Young's inequality to bound the first term  
911 on the right-hand side, we obtain

$$\beta \|b(\rho)\|^2 \leq \frac{\beta}{2} \|x_0\|^2 + \frac{\beta}{2} \|b(\rho)\| + a_1 + a_2,$$

912 which concludes the proof after rearranging terms. □

**Lemma 19** (Upper semi-continuity). *The functionals  $G_c : \mathcal{P}(\mathbb{R}^d) \times \mathbb{R}^d \rightarrow [-\infty, +\infty]$  is upper semi-continuous when  $\mathcal{P}(\mathbb{R}^2) \times \mathbb{R}^d$  is endowed with the product topology of the weak-\* topology and the Euclidean topology, and  $G_b : \mathcal{P}(\mathbb{R}^d) \rightarrow [-\infty, +\infty]$  is upper semi-continuous with respect to the weak-\* topology.*

*Proof.* The functional  $G_c : \mathcal{P}(\mathbb{R}^d) \times \mathbb{R}^d \rightarrow [-\infty, +\infty]$  is continuous in the second variable thanks to Assumption 1. Similarly,  $\int f_1(z, x) d\rho(z) + \int f_2(z, x) d\bar{\rho}(z)$  is continuous in  $\rho$  thanks to [San15b, Proposition 7.1] using the continuity of  $f_1$  and  $f_2$ . Further,  $-P$  is upper semi-continuous using [Pos75] and [San15b, Proposition 7.2] thanks to Assumptions 2 and 3. This concludes the continuity properties for  $G_c$ .

The upper semi-continuity of  $G_b$  then follows from a direct application of a version of Berge's maximum theorem [AB06, Lemma 16.30]. Let  $R := \|x_0\|^2 + \frac{2(a_1+a_2)}{\beta} > 0$ . We define  $\varphi : (\mathcal{P}(\mathbb{R}^d), W_2) \rightarrow \mathbb{R}^d$  as the correspondence that maps any  $\rho \in \mathcal{P}(\mathbb{R}^d)$  to the closed ball  $\overline{B_R(0)} \subset \mathbb{R}^d$ . Then the graph of  $\varphi$  is  $\text{Gr } \varphi = \mathcal{P}(\mathbb{R}^d) \times \{\overline{B_R(0)}\}$ . With this definition of  $\varphi$ , the range of  $\varphi$  is compact and  $\varphi$  is continuous with respect to weak-\* convergence, and so it is in particular upper hemicontinuous. Thanks to Lemma 18, the best response function  $b(\rho)$  is always contained in  $\overline{B_R(0)}$  for any choice of  $\rho \in \mathcal{P}(\mathbb{R}^d)$ . As a result, maximizing  $-G_c(\rho, x)$  in  $x$  over  $\mathbb{R}^d$  for a fixed  $\rho \in \mathcal{P}(\mathbb{R}^d)$  reduces to maximizing it over  $\overline{B_R(0)}$ . Using the notation introduced above, we can restrict  $G_c$  to  $G_c : \text{Gr } \varphi \rightarrow \mathbb{R}$  and write

$$G_b(\rho) := \max_{\hat{x} \in \varphi(\rho)} -G_c(\rho, \hat{x}).$$

Because  $G_c(\rho, x)$  is upper semi-continuous when  $\mathcal{P}(\mathbb{R}^2) \times \mathbb{R}^d$  is endowed with the product topology of the weak-\* topology and the Euclidean topology, [AB06, Lemma 16.30] guarantees that  $G_b(\cdot)$  is upper semi-continuous in the weak-\* topology.  $\square$

**Lemma 20** (First variation of the best response). *The first variation of the best response of the classifier at  $\rho$  is*

$$\delta_\rho b[\rho](z) = -Q(\rho)^{-1} \nabla_x f_1(z, b(\rho))$$

where  $Q(\rho) \succeq (\beta + \lambda_1 + \lambda_2) \text{Id}$  is a symmetric matrix, constant in  $z$  and  $x$ , defined as

$$Q(\rho) := \beta \text{Id} + \int \nabla_x^2 f_1(z, b(\rho)) d\rho(z) + \int \nabla_x^2 f_2(z, b(\rho)) d\bar{\rho}(z).$$

*Proof.* We compute  $\delta_\rho b[\rho](z)$  by using that any minimizer of  $G_c(\rho, x)$  for fixed  $\rho$  must satisfy

$$\nabla_x G_c(\rho, b(\rho)) = 0.$$

Taking the first variation on the left-hand side (assuming it exists), we obtain

$$\delta_\rho \nabla_x G_c[\rho, b(\rho)] + \delta_\rho b[\rho](z) \nabla_x^2 G_c(\rho, b(\rho)) = 0.$$

Next, we explicitly compute all terms involved and show that  $\nabla_x^2 G_c(\rho, b(\rho))$  is invertible. Computing the derivatives yields

$$\begin{aligned} \nabla_x G_c(\rho, x) &= \int \nabla_x f_1(z, x) d\rho(z) + \int \nabla_x f_2(z, x) d\bar{\rho}(z) + \beta(x - x_0) \\ \delta_\rho \nabla_x G_c[\rho, x](z) &= \nabla_x f_1(z, x) \\ \nabla_x^2 G_c(\rho, x) &= \int \nabla_x^2 f_1(z, x) d\rho(z) + \int \nabla_x^2 f_2(z, x) d\bar{\rho}(z) + \beta \text{Id}. \end{aligned}$$

Note that  $\nabla_x^2 G_c$  is invertible by Assumption 1, which states that  $f_1$  and  $f_2$  have positive-definite Hessians. Inverting this term and evaluating at  $x = b(\rho)$  gives the first variation:

$$\delta_\rho b[\rho](z) = - \left[ \beta \text{Id} + \int \nabla_x^2 f_1(z, b(\rho)) d\rho(z) + \int \nabla_x^2 f_2(z, b(\rho)) d\bar{\rho}(z) \right]^{-1} \nabla_x f_1(z, b(\rho)).$$

The lower bound on  $Q(\rho)$  also follows thanks to Assumption 1.  $\square$

**Proposition 21.** *Let  $\alpha, \beta > 0$  and assume Assumptions 1-4 hold with the parameters satisfying  $\alpha\tilde{\lambda} > \Lambda_1$ . Fix  $\rho_0, \rho_1 \in \mathcal{P}(\mathbb{R}^d)$ . Along any geodesic  $(\rho_s)_{s \in [0,1]} \in \mathcal{P}_2(\mathbb{R}^d)$  connecting  $\rho_0$  to  $\rho_1$ , we have for all  $s \in [0, 1]$*

$$\frac{d^2}{ds^2} G_b(\rho_s) \leq -\lambda_b W_1(\rho_0, \rho_1)^2, \quad \lambda_b := \alpha\tilde{\lambda} - \Lambda_1. \quad (26)$$

As a result, the functional  $G_b : \mathcal{P}_2(\mathbb{R}^d) \rightarrow [-\infty, +\infty]$  is uniformly displacement concave with constant  $\lambda_b > 0$ .

942 *Proof.* Consider any  $\rho_0, \rho_1 \in \mathcal{P}_2(\mathbb{R}^d)$ . Then any  $W_2$ -geodesic  $(\rho_s)_{s \in [0,1]}$  connecting  $\rho_0$  with  $\rho_1$  solves the  
 943 following system of geodesic equations:

$$\begin{cases} \partial_s \rho_s + \operatorname{div}(\rho_s v_s) = 0, \\ \partial_s(\rho_s v_s) + \operatorname{div}(\rho_s v_s \otimes v_s) = 0, \end{cases} \quad (27)$$

944 where  $\rho_s : \mathbb{R}^d \rightarrow \mathbb{R}$  and  $v_s : \mathbb{R}^d \mapsto \mathbb{R}^d$ . The first derivative of  $G_b$  along geodesics can be computed explicitly  
 945 as

$$\begin{aligned} \frac{d}{ds} G_b(\rho_s) &= \int \nabla_z f_1(z, b(\rho_s)) \cdot v_s(z) \rho_s(z) dz - \frac{d}{ds} P(\rho_s) \\ &\quad + \left\langle \left[ \int \nabla_x f_1(z, x) d\rho_s(z) + \int \nabla_x f_2(z, x) d\bar{\rho}(z) + \beta(x - x_0) \right] \Big|_{x=b(\rho_s)}, \frac{d}{ds} b(\rho_s) \right\rangle. \end{aligned}$$

946 The left-hand side of the inner product is zero by definition of the best response  $b(\rho_s)$  to  $\rho_s$ , see (25). Therefore

$$\frac{d}{ds} G_b(\rho_s) = \int \nabla_z f_1(z, b(\rho_s)) \cdot v_s(z) \rho_s(z) dz - \frac{d}{ds} P(\rho_s).$$

947 Differentiating a second time, using (27) and integration by parts, we obtain

$$\frac{d^2}{ds^2} G_b(\rho_s) = L_1(\rho_s) + L_2(\rho_s) - \frac{d^2}{ds^2} P(\rho_s),$$

948 where

$$\begin{aligned} L_1(\rho_s) &:= \int \nabla_z^2 f_1(z, b(\rho_s)) \cdot (v_s \otimes v_s) \rho_s dz = \int \langle v_s, \nabla_z^2 f_1(z, b(\rho_s)) \cdot v_s \rangle \rho_s dz, \\ L_2(\rho_s) &:= \int \frac{d}{ds} b(\rho_s) \cdot \nabla_x \nabla_z f_1(z, b(\rho_s)) \cdot v_s(z) \rho_s(z) dz. \end{aligned}$$

From (16), we have that

$$\frac{d^2}{ds^2} \tilde{P}(\rho_s) \geq \alpha \tilde{\lambda} W_2(\rho_0, \rho_1)^2,$$

949 and thanks to Assumption 4

950 we have

$$L_1(s) \leq \Lambda_1 W_2(\rho_0, \rho_1)^2.$$

951 This leaves  $L_2$  to bound; we first consider the term  $\frac{d}{ds} b(\rho_s)$ :

$$\begin{aligned} \frac{d}{ds} b(\rho_s) &= \int \delta_\rho b[\rho_s](\tilde{z}) \partial_s \rho_s(d\tilde{z}) = - \int \delta_\rho b[\rho_s](\tilde{z}) \operatorname{div}(\rho_s v_s) d\tilde{z} \\ &= \int \nabla_z \delta_\rho b[\rho_s](\tilde{z}) \cdot v_s(\tilde{z}) d\rho_s(\tilde{z}). \end{aligned}$$

952 Defining  $u(\rho_s) \in \mathbb{R}^d$  by

$$u(\rho_s) := \int \nabla_x \nabla_z f_1(z, b(\rho_s)) \cdot v_s(z) d\rho_s(z),$$

953 using the results from Lemma 20 for  $\nabla_z \delta_\rho b[\rho_s]$ , Assumption 1 and the fact that  $Q(\rho)$  is constant in  $z$  and  $x$ , we  
 954 have

$$\begin{aligned} L_2(\rho_s) &= - \iint [Q(\rho_s)^{-1} \nabla_x \nabla_z f_1(\tilde{z}, b(\rho_s)) \cdot v_s(\tilde{z})] \cdot \nabla_x \nabla_z f_1(z, b(\rho_s)) \cdot v_s(z) d\rho_s(z) d\rho_s(\tilde{z}) \\ &= - \langle u(\rho_s), Q(\rho_s)^{-1} u(\rho_s) \rangle \leq 0 \end{aligned}$$

955 Combining all terms together, we have that

$$\frac{d^2}{ds^2} G_b(\rho_s) \leq - \left( \alpha \tilde{\lambda} - \Lambda_1 \right) W_2(\rho_0, \rho_1)^2.$$

956

□

957 **Remark 9.** Under some additional assumptions on the functions  $f_1$  and  $f_2$ , we can obtain an improved  
 958 convergence rate. In particular, assume that for all  $z, x \in \mathbb{R}^d$ ,

959 • there exists a constant  $\Lambda_2 \geq \lambda_2 \geq 0$  such that  $\nabla_x^2 f_2(z, x) \preceq \Lambda_2 \operatorname{Id}$ ;

960 • there exists a constant  $\sigma \geq 0$  such that  $\|\nabla_x \nabla_z f_1(z, x)\| \geq \sigma$ .

961 Then we have  $-Q(\rho_s)^{-1} \preceq -1/(\beta + \Lambda_1 + \Lambda_2) \mathbf{I}_d$ . Using Lemma 20, we then obtain a stronger bound on  $L_2$   
 962 as follows:

$$\begin{aligned} L_2(\rho_s) &\leq -\frac{1}{\beta + \Lambda_1 + \Lambda_2} \|u(\rho_s)\|^2 \leq -\frac{1}{\beta + \Lambda_1 + \Lambda_2} \int \|\nabla_x \nabla_z f_1(z, b(\rho_s))\|^2 d\rho_s(z) \int \|v_s(z)\|^2 d\rho_s(z) \\ &\leq -\frac{\sigma^2}{\beta + \Lambda_1 + \Lambda_2} W_2(\rho_0, \rho_1)^2. \end{aligned}$$

963 This means we can improve the convergence rate in (26) to  $\lambda_b := \alpha\tilde{\lambda} + \frac{\sigma^2}{\beta + \Lambda_1 + \Lambda_2} - \Lambda_1$ .

964 **Proposition 22** (Ground state). *Let Assumptions 1-4 hold for  $\alpha\tilde{\lambda} > \Lambda_1 \geq 0$  and  $\beta > 0$ . Then there exists*  
 965 *a unique maximizer  $\rho_*$  for the functional  $G_b$  over  $\mathcal{P}(\mathbb{R}^d)$ , and it satisfies  $\rho_* \in \mathcal{P}_2(\mathbb{R}^d) \cap L^1(\mathbb{R}^d)$  and  $\rho_*$  is*  
 966 *absolutely continuous with respect to  $\tilde{\rho}$ .*

967 *Proof.* Uniqueness of the maximizer (if it exists) is guaranteed by the uniform concavity provided by Lemma 21.  
 968 To show existence of a maximizer, we use the direct method in the calculus of variations, requiring the  
 969 following key properties for  $G_b$ : (1) boundedness from above, (2) upper semi-continuity, and (3) tightness  
 970 of any minimizing sequence. To show (1), note that  $\nabla_z^2(f_1(z, x) + \alpha \log \tilde{\rho}(z)) \preceq -(\alpha\tilde{\lambda} - \Lambda_1) \mathbf{I}_d$  for all  
 971  $z, x \in \mathbb{R}^d \times \mathbb{R}^d$  by Assumptions 2 and 4, and so

$$f_1(z, x) + \alpha \log \tilde{\rho}(z) \leq c_0(x) - \frac{(\alpha\tilde{\lambda} - \Lambda_1)}{4} |z|^2 \quad \forall (z, x) \in \mathbb{R}^d \times \mathbb{R}^d \quad (28)$$

972 with  $c_0(x) := f_1(0, x) + \alpha \log \tilde{\rho}(0) + \frac{1}{\alpha\tilde{\lambda} - \Lambda_1} \|\nabla_z [f_1(0, x) + \alpha \log \tilde{\rho}(0)]\|^2$ . Therefore,

$$\begin{aligned} G_b(\rho) &= \int [f_1(z, b(\rho)) + \alpha \log \tilde{\rho}(z)] d\rho(z) + \int f_2(z, b(\rho)) d\tilde{\rho}(z) + \frac{\beta}{2} \|b(\rho) - x_0\|^2 \\ &\quad - \alpha \int \rho \log \rho - \int \rho W * \rho \\ &\leq c_0(b(\rho)) + \int f_2(z, b(\rho)) d\tilde{\rho}(z) + \frac{\beta}{2} \|b(\rho) - x_0\|^2. \end{aligned}$$

973 To estimate each of the remaining terms on the right-hand side, denote  $R := \|x_0\|^2 + \frac{2(\alpha_1 + \alpha_2)}{\beta}$  and recall that  
 974  $\|b(\rho)\| \leq R$  for any  $\rho \in \mathcal{P}(\mathbb{R}^d)$  thanks to Lemma 18. By continuity of  $f_1$  and  $\log \tilde{\rho}$ , there exists a constant  
 975  $c_1 \in \mathbb{R}$  such that

$$\sup_{x \in B_R(0)} c_0(x) = \sup_{x \in B_R(0)} \left[ f_1(0, x) + \alpha \log \tilde{\rho}(0) + \frac{1}{\alpha\tilde{\lambda} - \Lambda_1} \|\nabla_z [f_1(0, x) + \alpha \log \tilde{\rho}(0)]\|^2 \right] \leq c_1. \quad (29)$$

976 The second term is controlled by  $c_2$  thanks to Assumption 4. And the third term can be bounded directly to  
 977 obtain

$$G_b(\rho) \leq c_1 + c_2 + \beta(R^2 + \|x_0\|^2).$$

978 This concludes the proof of (1). Statement (2) was shown in Lemma 19. Then we obtain a minimizing sequence  
 979  $(\rho_n) \in \mathcal{P}(\mathbb{R}^d)$  which is in the closed unit ball of  $C_0(\mathbb{R}^d)^*$  and so the Banach-Alaoglu theorem [Rud91, Theorem  
 980 3.15] there exists a limit  $\rho_*$  in the Radon measures and a subsequence (not relabeled) such that  $\rho_n \xrightarrow{*} \rho_*$ . In fact,  
 981  $\rho_*$  is absolutely continuous with respect to  $\tilde{\rho}$  as otherwise  $G_b(\rho_*) = -\infty$ , which contradicts that  $G_b(\cdot) > -\infty$   
 982 somewhere. We conclude that  $\rho_* \in L^1(\mathbb{R}^d)$  since  $\tilde{\rho} \in L^1(\mathbb{R}^d)$  by Assumption 2. To ensure  $\rho_* \in \mathcal{P}(\mathbb{R}^d)$ ,  
 983 we require (3) tightness of the minimizing sequence  $(\rho_n)$ . By Markov's inequality [Gho02] it is sufficient to  
 984 establish a uniform bound on the second moments:

$$\int \|z\|^2 d\rho_n(z) < C \quad \forall n \in \mathbb{N}. \quad (30)$$

985 To see this we proceed in a similar way as in the proof of Proposition 10. Defining

$$K(\rho) := - \int [f_1(z, b(\rho)) + \alpha \log \tilde{\rho}(z)] d\rho(z) + \alpha \int \rho \log \rho dz + \frac{1}{2} \int \rho W * \rho dz,$$

986 we have  $K(\rho) = -G_b(\rho) + \int f_2(z, b(\rho)) d\tilde{\rho}(z) + \frac{\beta}{2} \|b(\rho) - x_0\|^2$ . Then using again the bound on  $b(\rho)$  from  
 987 Lemma 18,

$$\begin{aligned} K(\rho) &\leq -G_b(\rho) + \sup_{x \in B_R(0)} \int f_2(z, x) d\tilde{\rho}(z) + \beta(R^2 + \|x_0\|^2) \\ &\leq -G_b(\rho) + c_2 + \beta(R^2 + \|x_0\|^2), \end{aligned}$$

where the last inequality is thanks to Assumption 4. Hence, using the estimates (28) and (29) from above, and noting that the sequence  $(\rho_n)$  is minimizing  $(-G_b)$ , we have

$$\begin{aligned} \frac{(\alpha\tilde{\lambda} - \Lambda_1)}{4} \int \|z\|^2 d\rho_n(z) &\leq c_0(b(\rho_n)) - \int [f_1(z, b(\rho_n)) + \alpha \log \tilde{\rho}(z)] d\rho_n(z) \\ &\leq c_1 + K(\rho_n) \leq c_1 - G_b(\rho_n) + c_2 + \beta (R^2 + \|x_0\|^2) \\ &\leq c_1 - G_b(\rho_1) + c_2 + \beta (R^2 + \|x_0\|^2) < \infty. \end{aligned}$$

which uniformly bounds the second moments of  $(\rho_n)$ . This concludes the proof for the estimate (30) and also ensures that  $\rho_* \in \mathcal{P}_2(\mathbb{R}^d)$ .  $\square$

**Corollary 23.** Any maximizer  $\rho_*$  of  $G_b$  is a steady state for equation (4) according to Definition 9, and satisfies  $\text{supp}(\rho_*) = \text{supp}(\tilde{\rho})$ .

*Proof.* To show that  $\rho_*$  is a steady state we can follow exactly the same argument as in the proof of Corollary 12, just replacing  $-\frac{1}{\alpha} \int f_1(z, x) \mu_*(x)$  with  $+\frac{1}{\alpha} \int f_1(z, b(\rho_*))$ . It remains to show that  $\text{supp}(\rho_*) = \text{supp}(\tilde{\rho})$ . As  $\rho_*$  is a maximizer, it is in particular a critical point, and therefore satisfies that  $\delta_\rho G_b[\rho_*](z)$  is constant on all connected components of  $\text{supp}(\rho_*)$ . Thanks to Lemma 17, this means there exists a constant  $c[\rho_*]$  (which may be different on different components of  $\text{supp}(\rho_*)$ ) such that

$$f_1(z, b(\rho_*)) - \alpha \log \left( \frac{\rho_*(z)}{\tilde{\rho}(z)} \right) - W * \rho_*(z) = c[\rho_*] \quad \text{on } \text{supp}(\rho_*).$$

Rearranging, we obtain (for a possible different constant  $c[\rho_*] \neq 0$ )

$$\rho_*(z) = c[\rho_*] \tilde{\rho}(z) \exp \left[ \frac{1}{\alpha} (f_1(z, b(\rho_*)) - W * \rho_*(z)) \right] \quad \text{on } \text{supp}(\rho_*). \quad (31)$$

Firstly, note that  $\text{supp}(\rho_*) \subset \text{supp}(\tilde{\rho})$  since  $\rho_*$  is absolutely continuous with respect to  $\tilde{\rho}$ . Secondly, note that  $\exp \frac{1}{\alpha} f_1(z, b(\rho_*)) \geq 1$  for all  $z \in \mathbb{R}^d$  since  $f_1 \geq 0$ . Finally, we claim that  $\exp(-\frac{1}{\alpha} W * \rho_*(z)) > 0$  for all  $z \in \mathbb{R}^d$ . In other words, we claim that  $W * \rho_*(z) < \infty$  for all  $z \in \mathbb{R}^d$ . This follows by exactly the same argument as in Corollary 12, see equation (19). We conclude that  $\text{supp}(\rho_*) = \text{supp}(\tilde{\rho})$ .  $\square$

**Remark 10.** If we have in addition that  $\tilde{\rho} \in L^\infty(\mathbb{R}^d)$  and  $f_1(\cdot, x) \in L^\infty(\mathbb{R}^d)$  for all  $x \in \mathbb{R}^d$ , then the maximizer  $\rho_*$  of  $G_b$  is in  $L^\infty(\mathbb{R}^d)$  as well. This follows directly by bounding the right-hand side of (31).

With the above preliminary results, we can now show the HWI inequality, which implies again a Talagrand-type inequality and a generalized logarithmic Sobolev inequality.

**Proposition 24** (HWI inequalities). Define the dissipation functional

$$D_b(\gamma) := \iint |\delta_\rho G_b[\rho](z)|^2 d\rho(z).$$

Assume  $\alpha, \beta > 0$  such that  $\alpha\tilde{\lambda} > \Lambda_1 + \sigma^2$ , and let  $\lambda_b$  as defined in (26). Denote by  $\rho_*$  the unique maximizer of  $G_b$ .

**(HWI)** Let  $\rho_0, \rho_1 \in \mathcal{P}_2(\mathbb{R}^d)$  such that  $G_b(\rho_0), G_b(\rho_1), D_b(\rho_0) < \infty$ . Then

$$G_b(\rho_0) - G_b(\rho_1) \leq \overline{W}(\rho_0, \rho_1) \sqrt{D_b(\rho_0)} - \frac{\lambda_b}{2} W_2(\rho_0, \rho_1)^2 \quad (32)$$

**(logSob)** Any  $\rho \in \mathcal{P}_2(\mathbb{R}^d)$  such that  $G(\rho), D_b(\rho) < \infty$  satisfies

$$D_b(\rho) \geq 2\lambda_b G_a(\rho | \rho_*). \quad (33)$$

**(Talagrand)** For any  $\rho \in \mathcal{P}_2(\mathbb{R}^d)$  such that  $G_b(\rho) < \infty$ , we have

$$W_2(\rho, \rho_*)^2 \leq \frac{2}{\lambda_b} G_b(\rho | \rho_*). \quad (34)$$

*Proof.* The proof for this result follows analogously to the arguments presented in the proofs of Proposition 13, Corollary 14 and Corollary 15, using the preliminary results established in Proposition 21 and Proposition 22.  $\square$

*Proof of Theorem 2.* Following the same approach as in the proof of Theorem 1, the results in Theorem 2 immediately follow by combining Proposition 22, Corollary 23 and Proposition 24 applied to solutions of the PDE (4).  $\square$

## 1019 D Proof of Theorem 3

The proof for this theorem uses similar strategies as that of Theorem 2, but is simpler due to the evolution reducing to an ODE rather than a PDE. Recall that for any  $x \in \mathbb{R}^d$  the best response  $r(x)(\cdot) \in \mathcal{P}(\mathbb{R}^d)$  in (5) is defined as

$$r(x) := \operatorname{argmin}_{\tilde{\rho} \in \mathcal{P}} -G_c(\tilde{\rho}, x).$$

1020

1021 **Lemma 25.** *Let Assumptions 3 and 4 hold. Then for each  $x \in \mathbb{R}^d$  there exists a unique maximizer  $\rho_* := r(x)$*   
 1022 *solving  $\operatorname{argmax}_{\tilde{\rho} \in \mathcal{P}_2} G_c(\tilde{\rho}, x)$ .*

1023 *Proof.* Equivalently, consider the minimization problem for  $F(\rho) = -\int f_1(z, x) d\rho(z) + \alpha KL(\rho | \tilde{\rho}) +$   
 1024  $\frac{1}{2} \int \rho W * \rho$  with some fixed  $x$ . Note that we can rewrite  $F(\rho)$  as

$$F(\rho) = \int \rho \log \rho dz + \int V(z) d\rho(z) + \frac{1}{2} \int \rho W * \rho$$

1025 where  $V(z) := -(f_1(z, x) + \alpha \log \tilde{\rho}(z))$  is convex by Assumption 4. Together with Assumption 3, we can  
 1026 directly apply the uniqueness and existence result from [CMV03, Theorem 2.1 (i)].  $\square$

1027 The best response function  $r(x)$  is supported on the whole of  $\mathbb{R}^d$  thanks to the diffusion term  $\int \rho \log \rho$  in  $G_c$ ,  
 1028 and there exists a function  $c : \mathbb{R}^d \mapsto \mathbb{R}$  such that  $r(x)(z)$  solves the Euler-Lagrange equation

$$\delta_\rho G_c[\rho, x](z) := \alpha \log \rho(x) - (f_1(z, x) + \alpha \log \tilde{\rho}(z)) + (W * \rho)(z) = c(x) \quad \text{for all } (z, x) \in \mathbb{R}^d \times \mathbb{R}^d. \quad (35)$$

1029 **Lemma 26.** *Let  $r(x)$  as defined in (5). If  $r \in C^1(\mathbb{R}^d; \mathcal{P}(\mathbb{R}^d))$ , then we have  $\nabla_x G_d(x) =$*   
 1030  *$(\nabla_x G_c(\rho, x))|_{\rho=r(x)}$ .*

1031 *Proof.* We start by computing  $\nabla_x G_d(x)$ . We have

$$\begin{aligned} \nabla_x G_d(x) &= \nabla_x (G_c(r(x), x)) = \int \delta_\rho [G_c(\rho, x)]|_{\rho=r(x)}(z) \nabla_x r(x)(z) dz + (\nabla_x G_c(\rho, x))|_{\rho=r(x)} \\ &= c(x) \nabla_x \int r(x)(z) dz + (\nabla_x G_c(\rho, x))|_{\rho=r(x)} = (\nabla_x G_c(\rho, x))|_{\rho=r(x)}, \end{aligned}$$

1032 where we used that  $r(x)$  solves the Euler-Lagrange equation (35) and that  $r(x) \in \mathcal{P}(\mathbb{R}^d)$  for any  $x \in \mathbb{R}^d$  so  
 1033 that  $\int r(x)(z) dz$  is independent of  $x$ .  $\square$

1034 **Remark 11.** *By showing suitable bounds on the second derivative of  $G_d(x)$ , the regularity assumption on  $r(x)$*   
 1035 *can be removed following the approach in [Liu+21].*

1036 **Lemma 27.** *Let Assumption 1 hold. Then  $G_d : \mathbb{R}^d \rightarrow \mathbb{R} \cup \{+\infty\}$  is strongly convex with constant  $\lambda_d :=$*   
 1037  $\lambda_1 + \lambda_2 + \beta > 0$ .

1038 *Proof.* The energy  $G_c(\rho, x)$  is strongly convex in  $x$  due to our assumptions on  $f_1, f_2$ , and the regularizing term  
 1039  $\|x - x_0\|_2^2$ . This means that for any  $\rho \in \mathcal{P}$ ,

$$G_c(\rho, x) \geq G_c(\rho, x') + \nabla_x G_c(\rho, x')^\top (x - x') + \frac{\lambda_d}{2} \|x - x'\|_2^2.$$

1040 Selecting  $\rho = r(x')$ , we have

$$G_c(r(x'), x) \geq G_c(r(x'), x') + \nabla_x G_c(r(x'), x')^\top (x - x') + \frac{\lambda_d}{2} \|x - x'\|_2^2.$$

1041 Since  $G_c(r(x'), x) \leq G_c(r(x), x)$  by definition of  $r(x)$ , we obtain the required convexity condition:

$$G_d(x) = G_c(r(x), x) \geq G_c(r(x'), x') + \nabla_x G_c(r(x'), x')^\top (x - x') + \frac{\lambda_d}{2} \|x - x'\|_2^2.$$

1042  $\square$

1043 *Proof of Theorem 3.* For any reference measure  $\rho_0 \in \mathcal{P}$ , we have

$$G_d(x) \geq G_c(\rho_0, x) \geq -\alpha KL(\rho_0 | \tilde{\rho}) - \frac{1}{2} \int \rho_0 W * \rho_0 + \frac{\beta}{2} \|x - x_0\|^2$$

1044 and therefore,  $G_d$  is coercive. Together with the strong convexity provided by Lemma 27, we obtain the existence  
 1045 of a unique minimizer  $x_\infty \in \mathbb{R}^d$ . Convergence in norm now immediately follows also using Lemma 27: for  
 1046 solutions  $x(t)$  to (5), we have

$$\frac{1}{2} \frac{d}{dt} \|x(t) - x_\infty\|^2 = -(G_d(x(t)) - G_d(x_\infty)) \cdot (x(t) - x_\infty) \leq -\lambda_d \|x(t) - x_\infty\|^2.$$

1047 A similar result holds for convergence in entropy using the Polyák-Łojasiewicz convexity inequality

$$\frac{1}{2} \|\nabla G_d(x)\|_2^2 \geq \lambda_d (G_d(x) - G_d(x_\infty)),$$

1048 which is itself a direct consequence of strong convexity provided in Lemma 27. Then

$$\frac{d}{dt} (G_d(x(t)) - G_d(x_\infty)) = \nabla_x G_d(x(t)) \cdot \dot{x}(t) = -\|\nabla_x G_d(x(t))\|^2 \leq -2\lambda_d (G_d(x(t)) - G_d(x_\infty)),$$

1049 and so the result in Theorem 3 follows.  $\square$

## 1050 E Additional Simulation Results

1051 We simulate a number of additional scenarios to illustrate extensions beyond the setting with provable guarantees  
 1052 and in the settings for which we have results but no numerical implementations in the main paper. First, we  
 1053 simulate the aligned objectives setting in one dimension, corresponding to (3). Then we consider two settings  
 1054 which are not covered in our theory: (1) the previously-fixed distribution  $\bar{\rho}$  is also time varying, and (2) the  
 1055 algorithm does not have access to the full distributions of  $\rho$  and  $\bar{\rho}$  and samples from them to update. Lastly, we  
 1056 illustrate a classifier with the population attributes in two dimensions, which requires a different finite-volume  
 1057 implementation [CCH15, Section 2.2] than the one dimension version of the PDE due to flux in two dimensions.

### 1058 E.1 Aligned Objectives

1059 Here we show numerical simulation results for the aligned objectives case, where the population and distribution  
 1060 have the same cost function. In this setting, the dynamics are of the form

$$\begin{aligned} \partial_t \rho &= \operatorname{div} (\rho \nabla_z \delta_\rho G_a[\rho, \mu]) \\ &= \operatorname{div} \left( \rho \nabla_z \left( \int f_1(z, x) d\mu(x) + \alpha \log(\rho/\bar{\rho}) + W * \rho \right) \right) \\ \frac{d}{dt} x &= -\nabla_x \left( \int f_1(z, x) d\rho(z) + \int f_2(z, x) d\bar{\rho}(z) + \frac{\beta}{2} \|x - x_0\|^2 \right) \end{aligned}$$

1061 where  $f_1$  and  $f_2$  are as defined in section 4.1, and  $W = \frac{1}{20}(1 + z)^{-1}$ , a consensus kernel. Note that  $W$  does  
 1062 not satisfy Assumption 3, but we still observe convergence in the simulation. This is expected; in other works  
 1063 such as [CMV03], the assumptions on  $W$  are relaxed and convergence results proven given sufficient convexity  
 1064 of other terms. The regularizer  $\bar{\rho}$  is set to  $\rho_0$ , which models a penalty for the effort required of individuals to  
 1065 alter their attributes. The coefficient weights are  $\alpha = 0.1$  and  $\beta = 1$ , with discretization parameters  $dz = 0.1$ ,  
 1066  $dt = 0.01$ .

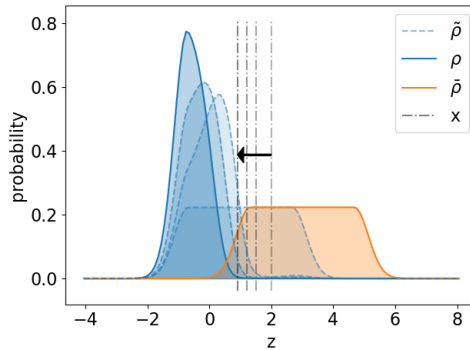

Figure 4: The dynamics include a consensus kernel, which draws neighbors in  $z$ -space closer together. We see that the population moves to make the classifier performer better, as the two distributions become more easily separable by the linear classifier.

1067 In Figure 4, we observe the strategic distribution separating itself from the stationary distribution, improving  
 1068 the performance of the classifier and also improving the performance of the population itself. The strategic  
 1069 distribution and classifier appear to be stationary by time  $t = 40$ .

## 1070 E.2 Multiple Dynamical Populations

1071 We also want to understand the dynamics when both populations are strategic and respond to the classifier. In  
 1072 this example, we numerically simulate this and in future work we hope to prove additional results regarding  
 1073 convergence. This corresponds to modeling the previously-fixed distribution  $\bar{\rho}$  as time-dependent; let this  
 1074 distribution be  $\tau \in \mathcal{P}_2$ . We consider the case where  $\rho$  is competitive with  $x$  and  $\tau$  is aligned with  $x$ , with  
 1075 dynamics given by

$$\begin{aligned} \partial_t \rho &= -\operatorname{div}(\rho \nabla_z (f_1(z, x) - \alpha \log(\rho/\bar{\rho}) - W * \rho)) \\ \partial_t \tau &= \operatorname{div}(\tau \nabla_z (f_2(z, x) + \alpha \log(\tau/\bar{\tau}) + W * \tau)) \\ \frac{d}{dt} x &= -\nabla_x \left( \int f_1(z, x) d\rho(z) + \int f_2(z, x) d\tau(z) + \frac{\beta}{2} \|x - x_0\|^2 \right). \end{aligned}$$

We use  $W = 0$  and  $f_1, f_2$  as in section 4.1 and the same discretization parameters as in Section E.1. In Figure 5,

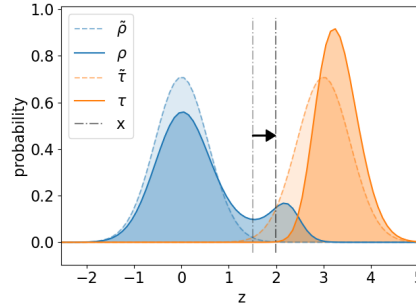

Figure 5: The population  $\rho$  aims to be classified with the  $\tau$  population, while the classifier moves to delineate between the two. We observe that  $\tau$  adjusts to improve the performance of the classifier while  $\rho$  competes against it. The distributions are plotted at time  $t = 0$ , corresponding to  $\bar{\rho}$  and  $\bar{\tau}$ , and time  $t = 20$ , corresponding to  $\rho$  and  $\tau$ .

1076 we observe that the  $\tau$  population moves to the right, assisting the classifier in maintaining accurate scoring.  
 1077 In contrast,  $\rho$  also moves to the right, rendering the right tail to be classified incorrectly, which is desirable  
 1078 for individuals in the  $\rho$  population but not desirable for the classifier. While we leave analyzing the long-term  
 1079 behavior mathematically for future work, the distributions and classifier appear to converge by time  $t = 20$ .  
 1080

## 1081 E.3 Sampled Gradients

1082 In real-world applications of classifiers, the algorithm may not know the exact distribution of the population,  
 1083 relying on sampling to estimate it. In this section we explore the effects of the classifier updating based on an  
 1084 approximated gradient, which is computed by sampling the true underlying distributions  $\rho$  and  $\bar{\rho}$ . We use the  
 1085 same parameters for the population dynamics as in section 4.1, and for the classifier we use the approximate  
 1086 gradient

$$\nabla_x L(z, x_t) \approx \sum_{i=1}^n \nabla_x f_1(z_i, x_t) + \nabla_x f_2(\bar{z}_i, x_t) + \beta(x_t - x_0), \quad z_i \sim \rho_t, \quad \bar{z}_i \sim \bar{\rho}_t.$$

1087 First, we simulate the dynamics with the classifier and the strategic population updating at the same rate, using  
 1088  $\alpha = 0.05$ ,  $\beta = 1$ , and the same consensus kernel as used previously, with the same discretization parameters as  
 1089 in E.1. In Figure 6, we observe no visual difference between the two results with  $n = 4$  versus  $n = 40$  samples,  
 1090 which suggests that not many samples are needed to estimate the gradient.

1091 Next, we consider the setting where the classifier is best-responding to the strategic population.

1092 Unlike the first setting, we observe in Figure 7 a noticeable difference between the evolution of  $\rho_t$  with  $n = 4$   
 1093 versus  $n = 40$  samples. This is not surprising because optimizing with a very poor estimate of the cost function  
 1094 at each time step would cause  $x_t$  to vary wildly, and this method fails to take advantage of correct "average"  
 1095 behavior that gradient descent provides.

## 1096 E.4 Two-dimensional Distributions

1097 In practice, individuals may alter more than one of their attributes in response to an algorithm, for example, both  
 1098 cancelling a credit card and also reporting a different income in an effort to change a credit score. We model this



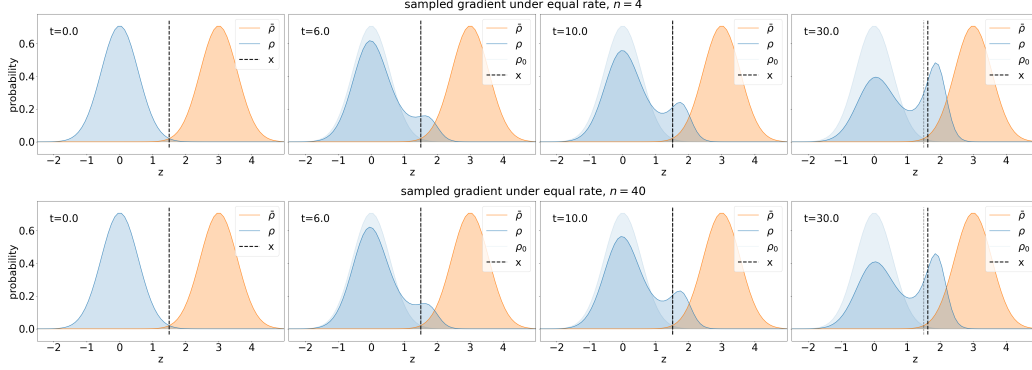

Figure 6: When the classifier is updating at the same rate as the population, we do not see a significant change in the evolution of both species, suggesting that as long as the gradient estimate for the classifier is correct on average, the estimate itself does not need to be particularly accurate.

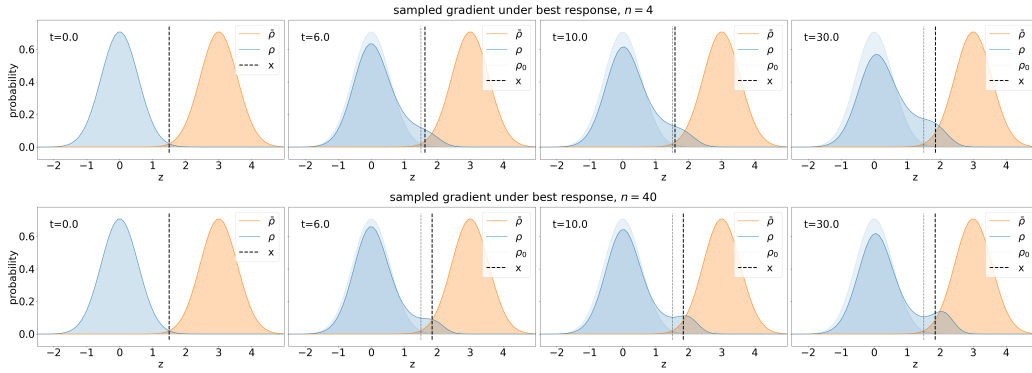

Figure 7: When the classifier is best-responding to the population, we observe that using  $n = 4$  samples leads to different behavior for both the classifier and the population, compared with a more accurate estimate using  $n = 40$  samples.

1099 case with  $z \in \mathbb{R}^2$  and  $x \in \mathbb{R}^2$ , and simulate the results for the setting where the classifier and the population  
 1100 are evolving at the same rate. While this setting is not covered in our theory, it interpolates between the two  
 1101 timescale extremes.

1102 We consider the following classifier:

$$\begin{aligned} f_1(z, x) &= \frac{1}{2} \left( 1 - \frac{1}{1 + \exp x^\top z} \right) \\ f_2(z, x) &= \frac{1}{2} \left( \frac{1}{1 + \exp x^\top z} \right) \end{aligned} \quad (36)$$

1103 with  $W = 0$ . Again, the reference distribution  $\tilde{\rho}$  corresponds to the initial shape of the distribution, instituting  
 1104 a penalty for deviating from the initial distribution. We use  $\alpha = 0.5$  and  $\beta = 1$  for the penalty weights, run  
 1105 for  $t = 4$  with  $dt = 0.005$  and  $dx = dy = 0.2$  for the discretization. In this case, the strategic population is  
 1106 competing with the classifier, with dynamics given by

$$\begin{aligned} \partial_t \rho &= -\operatorname{div}(\rho \nabla_z (f_1(z, x) - \alpha \log(\rho/\tilde{\rho}))) \\ \frac{d}{dt} x &= -\nabla_x \left( \int f_1(z, x) d\rho(z) + \int f_2(z, x) d\tilde{\rho}(z) + \frac{\beta}{2} \|x - x_0\|^2 \right) \end{aligned}$$

1107 In Figure 8, we observe the strategic population increasing mass toward the region of higher probability of being  
 1108 labeled "1" while the true underlying label is zero, with the probability plotted at time  $t = 4$ . This illustrates  
 1109 similar behavior to the one-dimensional case, including the distribution splitting into two modes, which is  
 1110 another example of polarization induced by the classifier. Note that while in this example,  $x \in \mathbb{R}^2$  and we use a  
 1111 linear classifier; we could have  $x \in \mathbb{R}^d$  with  $d > 2$  and different functions for  $f_1$  and  $f_2$  which yield a nonlinear  
 1112 classifier; our theory in the timescale-separated case holds as long as the convexity and smoothness assumptions  
 1113 on  $f_1$  and  $f_2$  are satisfied.

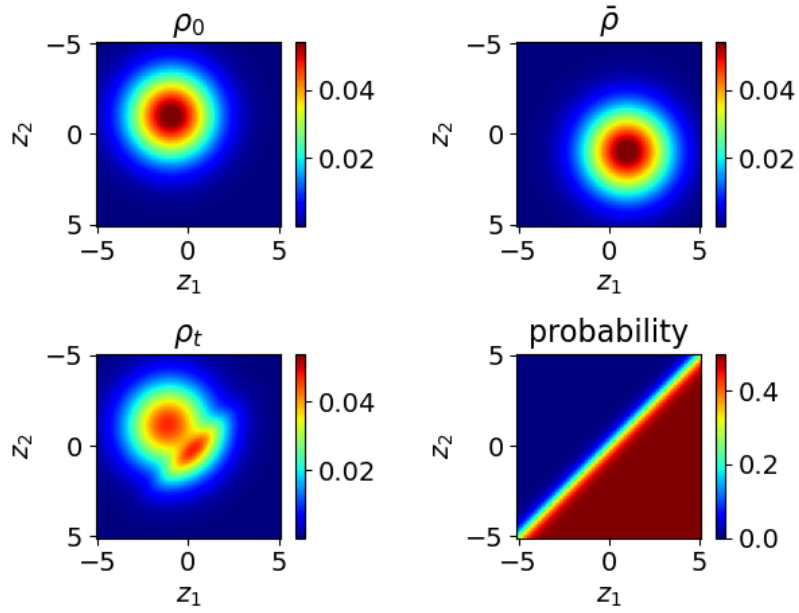

Figure 8: We use (36) for the classifier functions, using a Gaussian initial condition and regularizer for  $\rho$ . We see the distribution moving toward the region with higher probability of misclassification.
